1 **Purinergic receptor P2RY14 cAMP signaling regulates EGFR-driven Schwann cell**  
2 **precursor self-renewal and nerve tumor initiation in neurofibromatosis.**

3

4 Patriitti-Cram, Jennifer<sup>1,2</sup>, Wu, Jianqiang<sup>1,6</sup>, Kuninaka, Shinji<sup>3</sup>, Coover, Robert A.<sup>1,8</sup>,  
5 Hennigan, Robert F<sup>1</sup>., Rizvi, Tilat A.<sup>1</sup>, Chaney, Katherine E.<sup>1</sup>, Ramya Ravindran<sup>4</sup>,  
6 Cancelas, Jose A.<sup>1,7</sup>, Spinner, Robert J.<sup>5</sup>, and Ratner, Nancy<sup>1,6\*\*</sup>

7

8 <sup>1</sup>Division of Experimental Hematology and Cancer Biology, Cancer & Blood Diseases  
9 Institute, Cincinnati Children's Hospital Medical Center, Cincinnati, OH 45229, USA

10 <sup>2</sup>Neuroscience Graduate Program, University of Cincinnati College of Medicine,

11 Cincinnati, OH 45267-0713, USA <sup>3</sup>Division of Gene Regulation, Institute for Advanced

12 Medical Research, Keio University, Tokyo 108-8345, Japan, <sup>4</sup>Molecular and

13 Developmental Biology, Cincinnati Children's Hospital, Cincinnati, OH 45229, USA,

14 <sup>5</sup>Department of Neurosurgery, Mayo Clinic, Rochester, Minnesota 55902,

15 USA.<sup>6</sup>Department of Pediatrics, University of Cincinnati College of Medicine, Cincinnati,

16 OH, 45267, USA. <sup>7</sup>Hoxworth Blood Center, College of Medicine, University of Cincinnati,

17 Cincinnati, OH 45229, USA.

18 <sup>8</sup>Current address: Dept. of Basic Pharmaceutical Sciences, High Point University, High

19 Point, NC 27268, USA

20

21 **\*\*Corresponding Author:** Nancy Ratner, Cincinnati Children's Hospital Medical Center,

22 3333 Burnet Avenue, Cincinnati, OH 45229; phone: 513-636-9469; email:

23 [nancy.ratner@cchmc.org](mailto:nancy.ratner@cchmc.org)

24 **Lead Contact**

25 Further information and requests for resources and reagents should be directed to and

26 will be fulfilled by the Lead Contact, Nancy Ratner, PhD ([nancy.ratner@cchmc.org](mailto:nancy.ratner@cchmc.org)).

27

28

29

30

31

32

33

34

35

36

37

38

39

40

41

42

43

44

45

46

47 **Abstract/ Summary (170 words)**

48 Neurofibromatosis type 1 (NF1) is a genetic disorder characterized by nerve tumors called  
49 neurofibromas, in which Schwann cells (SCs) lack NF1 and show deregulated RAS  
50 signaling. NF1 is also implicated in regulation of cAMP. Gene expression profiling and  
51 protein expression identified P2RY14 in SCs and SC precursors (SCPs) implicating  
52 P2RY14 as a candidate upstream regulator of cAMP in EGF-dependent SCP. We found  
53 that SCP self-renewal was reduced by genetic or pharmacological inhibition of P2RY14.  
54 In *NF1* deficient SCs and malignant peripheral nerve sheath tumor (MPNST) cells,  
55 P2RY14 inhibition decreased EGFR-driven phospho-Akt and increased cAMP signaling.  
56 In a neurofibroma mouse model, genetic deletion of P2RY14 increased mouse survival,  
57 delayed neurofibroma initiation and rescued cAMP signaling. Conversely, elevation of  
58 cAMP diminished SCP number *in vitro* and diminished SC proliferation in neurofibroma  
59 bearing mice *in vivo*. These studies identify the purinergic receptor P2RY14 as a critical  
60 G-protein-coupled receptor (GPCR) in *NF1* mutant SCs and SCs and suggest roles for  
61 EGFR-GPCR crosstalk in facilitating SCP self-renewal and neurofibroma initiation via  
62 cAMP and EGFR-driven phospho-Akt.

63

64

65 **Keywords:** Neurofibromatosis type 1, NF1, Schwann cell-precursors, Schwann cell,  
66 P2RY14, neurofibromas, self-renewal, cAMP, EGFR, p-Akt, p-PKA peripheral nerve,  
67 tumorigenesis.

68

69

70 **Introduction** (5,585 characters)

71 Neurofibromatosis type 1 (NF1) is an autosomal dominant disease that affects up  
72 to 1:2,000 individuals worldwide (Kallionpää et al., 2018). To date, there is no cure for  
73 NF1, which is characterized by multiple, variable, clinical manifestations (Friedman, 1998;  
74 Tabata et al., 2020). At least half of the children with NF1 develop plexiform  
75 neurofibromas (PNs), which are tumors within peripheral nerves. PN may be present at  
76 birth and show most rapid growth during the first decade of a child's life (Nguyen, et al.,  
77 2012). PNs can occur in any cranial or peripheral nerve and have the potential to  
78 transform into lethal malignant peripheral nerve sheath tumors (MPNST) (Prudner, Ball,  
79 Rathore, & Hirbe, 2020). Neurofibroma infiltration of normal nerves in NF1 patients results  
80 in a complicated risk profile because it can cause nerve damage and compress nearby  
81 vital organs (Kim, et al., 2017). Therefore, understanding how neurofibromas form and  
82 how to treat them is under intense investigation.

83 Peripheral nerve glial cells, Schwann cells (SCs), are the only cell type in  
84 neurofibromas that show bi-allelic loss-of-function mutations in the *NF1* tumor suppressor  
85 gene (Serra et al., 1997, 2001). Neurofibroma SCs also show aberrant properties *ex vivo*,  
86 consistent with it being the primary pathogenic cell type in neurofibromas (Sheela et al.,  
87 1990; Kim et al., 1995). In mice, neural crest cells develop into Schwann cell precursors  
88 (SCPs) between embryonic day 11 (E11) and E13 (Jessen & Mirsky, 2019). SCs or  
89 related boundary cap cells can serve as cells-of-origin for neurofibromas, as loss of *Nf1*  
90 in these cells causes plexiform neurofibroma formation (Zhu et al., 2002; Wu et al., 2008;  
91 Chen, et al., 2014; Chen et. al., 2019).

92           *In vitro*, embryonic SCPs retain multi-lineage differentiation potential and self-  
93 renewal capabilities for several passages, indicating that they are progenitor-like cells  
94 (Jessen & Mirsky, 2019). Mouse SCPs also express epidermal growth factor receptor<sup>+</sup>  
95 (EGFR<sup>+</sup>) and respond to EGF with limited self-renewal (Williams et al. 2008). EGFR<sup>+</sup> cells  
96 that co-express the SC marker S100 account for about 1.8% human neurofibroma cells  
97 (DeClue, et al., 2000). The idea that these cells may be tumor-initiating cells is consistent  
98 with the finding that human neurofibromas sorted for co-expression of the SC marker p75<sup>+</sup>  
99 and EGFR show limited self-renewal *in vitro*. Also, EGFR-dependent *Nf1*<sup>-/-</sup> SCPs show  
100 increased self-renewal and form neurofibromas upon transplantation (Joseph et al., 2008;  
101 Williams et al. 2008). Together, these studies suggest the presence of progenitor-like  
102 cells in neurofibromas, which depend on EGFR for self-renewal.

103           EGFR signaling may also play additional roles in neurofibroma SCs. SCPs  
104 differentiate into SCs which when associated with a single large-diameter axonal segment  
105 become myelinating SCs. SCs associated with multiple smaller diameter axons become  
106 non-myelinating Remak cells (Mirsky et al., 2008). Neurofibroma SCs show a dramatic  
107 change in Remak Schwann cell morphology, bundling 1 or 2 few axons (Erlandson &  
108 Woodruff, 1982; Zheng, et al., 2008), rather than up to 20 small diameter axons in wildtype  
109 nerve Remak bundles (Harty & Monk, 2017). Notably, while neurofibromas rarely form,  
110 elevation of EGFR in wildtype SCs is sufficient to mimic this nerve-disruption phenotype  
111 (Ling, et al., 2005).

112           The *NF1* gene encodes neurofibromin, a GTPase activating protein that  
113 accelerates the hydrolysis of RAS-GTP to its inactive GDP-bound form downstream of  
114 EGFR (Simanshu, Nissley, & McCormick, 2017). In SCs, loss of neurofibromin causes

115 increases in GTP-bound RAS (Kim et al., 1995; Sherman et al., 2000), and RAS-GTP  
116 stimulates the mitogen-activated protein kinase (MAPK) pathway and other downstream  
117 pathways. Loss of *NF1* also causes reduced levels of cyclic AMP (cAMP) in *Nf1* mutant  
118 mouse, *fly* and zebrafish (Hegedus, et al., 2007; Tong, et al., 2002; Wolman et al., 2014;  
119 Anastasaki and Gutmann, 2014). Whether cAMP deregulation occurs downstream of  
120 increased RAS-GTP is unclear. Neurofibromin shares homology with the yeast proteins  
121 Ira1 and Ira2, which are inhibitory regulators of the RAS–cAMP adenylyl cyclase pathway,  
122 but no evidence shows a direct role for NF1 or IRA proteins in direct regulation of cAMP  
123 in mammals (Ballester, et al., 1990; Martin, et al., 1990; Xu, et al., 1990). It is unclear  
124 how, or if, regulation of cAMP is relevant to neurofibroma initiation or growth but reducing  
125 cAMP drove formation of brain tumors in cells lacking *Nf1* (Warrington et al., 2010).

126 We sought to identify molecules that might affect neurofibroma development and  
127 regulate EGFR signaling expression in the SC lineage. We identified P2RY14 as a G-  
128 protein coupled receptor (GPCR) overexpressed in neurofibroma SCP and SC. P2RY14  
129 is activated by extracellular UDP and UDP-sugars and signal through G<sub>i</sub> to inhibit  
130 adenylate cyclase (AC), decreasing cAMP (Abbracchio & Ceruti, 2006; Conroy, Kindon,  
131 Kellam & Stocks, 2016). Intriguingly, P2RY14 regulates homeostasis of hematopoietic  
132 stem/progenitor cells (Cho et al., 2014). Also, satellite glial cells (SGCs) and SCs have  
133 been reported to express P2RY14 *in vitro* (Patriitti-Cram, et al., 2021). Here we show that,  
134 *in vitro*, P2RY14 inhibition decreases mouse SCP self-renewal by modulation of cAMP  
135 and EGFR signaling. *In vivo*, P2RY14 knockout increased mouse survival and decreased  
136 tumor initiation and increasing cAMP in neurofibroma bearing decreased SC proliferation

137 in neurofibromas. We suggest that targeting the P2RY14 receptor pathway could be  
138 relevant for treatment of NF1.

139 **Results** (14,511 characters)

140

141 **P2RY14 is expressed in human neurofibroma Schwann cell precursors (SCP) and**

142 **promotes SCP self-renewal *in vitro*.** To characterize SCPs we used flow cytometry.

143 We dissociated cells from human plexiform neurofibromas resected for therapeutic

144 purposes from 3 neurofibroma patients. Cells were sorted into p75<sup>+</sup>/EGFR<sup>-</sup> SCs and

145 p75<sup>+</sup>/EGFR<sup>+</sup> SCP-like tumor initiating cells. We performed gene expression analysis on

146 these cells and found that *P2RY14* mRNA is elevated in p75<sup>+</sup>/EGFR<sup>+</sup> SCP-like tumor

147 initiating cells (**Figure 1A**). Western blot also showed expression in human SCs and

148 neurofibroma SCPs, with 1.9-fold increase of P2RY14 protein in SCP-like cells (**Figure**

149 **1B**). To test if P2RY14<sup>+</sup> SCP-like cells derived from human neurofibromas have altered

150 ability to self-renew, we performed fluorescence activated cells sorting (FACS) and sorted

151 SCP-like cells into p75<sup>+</sup>/EGFR<sup>+</sup>/P2RY14<sup>-</sup> and p75<sup>+</sup>/EGFR<sup>+</sup>/P2RY14<sup>+</sup> cells and plated

152 them at low density to generate unattached spheres *in vitro* (**Figure 1C, D, E**). Unsorted

153 neurofibroma cells rarely form SCP-like spheres. FACS analysis (of cells from 3 additional

154 neurofibroma tumors) showed that on average p75<sup>+</sup>/EGFR<sup>+</sup>/P2RY14<sup>-</sup> cells formed

155 spheres at a frequency of 23.4%, while 64.8% of p75<sup>+</sup>/EGFR<sup>+</sup>/P2RY14<sup>+</sup> cells formed

156 spheres. The p75<sup>+</sup>/EGFR<sup>+</sup>/P2RY14<sup>+</sup> cells maintained their significantly enhanced ability

157 to form spheres *in vitro* for three passages (**Figures 1F, 1G**). Thus, P2RY14 is

158 overexpressed in human neurofibroma SCs and SCPs *in vitro*, and marks SCP with the

159 potential to self-renew *in vitro*.

160 **Mouse *Nf1* mutant SCPs use P2RY14 signaling through G<sub>i</sub> to regulate self-renewal.**

161 We verified P2RY14 expression in cultured SCP spheres from wild-type (*WT*) and *Nf1*<sup>-/-</sup>

162 mouse embryos. P2RY14 protein was slightly elevated in *Nf1*<sup>-/-</sup> SCPs (**Figure 2A**).



163 P2RY14 signaling is relevant in this setting, as pharmacological inhibition of P2RY14 with  
164 the highly selective P2RY14 inhibitor PPTN (4-[4-(4-Piperidinyl)phenyl]-7-[4-  
165 (trifluoromethyl)phenyl]-2-naphthalenecarboxylic acid hydrochloride) (Robichaud et al.,  
166 2011) reduced the percentage of *Nf1*<sup>-/-</sup> mouse SCPs that formed spheres, but had little  
167 effect on wild-type SCPs, consistent with a role in *Nf1* mutant SCP self-renewal (**Figure**  
168 **2B**). Photographs of spheres are shown in **Supplemental figure 1A**; this experiment was  
169 repeated in 3 biological replicates with similar results. Dose response analysis confirmed  
170 the optimal concentration of the P2RY14 inhibitor (PPTN) is 300nM; as 500nM PPTN was  
171 toxic (**Supplemental figures 2A-2F**).

172 To confirm these results, we silenced P2RY14 gene expression using short-hairpin  
173 RNAs (shRNAs) targeting P2RY14. *WT* and *Nf1*<sup>-/-</sup> mouse SCPs were treated with non-  
174 target control (shNT) or shRNA P2RY14 (shP2RY14). shP2RY14 treated cells showed  
175 reduced *P2RY14* mRNA (**Figure 2C**) and P2RY14 protein (**Figure 2D**). Sphere formation  
176 was significantly decreased in *Nf1*<sup>-/-</sup> SCPs but not wild-type treated with *P2RY14* shRNA,  
177 and this phenotype also persisted for 3 passages (**Figure 2E**). Photomicrographs are  
178 shown for one shRNA (sh09) (**Supplemental figure 1B**); but the experiment was  
179 repeated with 2 additional P2RY14 shRNAs in 3 biological replicates each, with similar  
180 results (**Supplemental figure 3A-3D**). To delineate signaling pathways affected by  
181 P2RY14 shRNA in SCPs, we analyzed cell lysates in western blots. We found that  
182 shP2RY14 caused a slight decrease in pERK, a read-out of RAS/MAPK signaling, which  
183 we know to be elevated in *Nf1*<sup>-/-</sup> cells (**Figure 2F**). We analyzed cAMP-dependent protein  
184 kinase (PKA) substrate phosphorylation (using anti p-PKA substrate antibody) as an  
185 indirect read out of cAMP levels in cells. p-PKA substrate phosphorylation increased in

186 *WT* and *Nf1*<sup>-/-</sup> SCPs shP2RY14 treated cells. Interestingly, knockdown of P2RY14 in *Nf1*<sup>-/-</sup>  
187 SCPs increased levels of pPKA, similar to those in *WT* shNT levels (**Figure 2G**).

188 To understand if P2RY14-mediated changes in cAMP signaling affect SCP self-  
189 renewal, we treated *WT* and *Nf1*<sup>-/-</sup> SCPs with the specific phosphodiesterase-4 (PDE4)  
190 inhibitor, rolipram. Rolipram blocks degradation of cAMP by PDE4, increasing intracellular  
191 levels of cAMP (MacKenzie & Houslay, 2000). Treatment with 1uM rolipram or 300nM of  
192 the P2RY14 inhibitor (PPTN) decreased *Nf1*<sup>-/-</sup> SCP self-renewal; the combination showed  
193 additional effect, largely at early passage (**Figure 2H**). Photographs of these experiments  
194 are shown in **Supplemental Figure 1C**. These results support the idea that the elevated  
195 self-renewal in *Nf1*<sup>-/-</sup> SCP is due, at least in part, to P2RY14 G<sub>i</sub>-mediated changes in  
196 cAMP.

197 **P2RY14 inhibition increases cAMP and decreases EGFR activation and**  
198 **downstream signaling.** To test if the relationship between P2RY14, cAMP and NF1  
199 found in SCPs also exists in SCs, we turned to cell lines that enable biochemical analysis  
200 and used human immortalized SCs (iHSCs) (Li et al., 2016). We used lentivirus infection  
201 and the CRISPR/Cas9 system to generate 1 $\Delta$ NF1 (NF1 deficient iHSCs). Pooled  
202 puromycin resistant cells were evaluated for NF1 growth over time and NF1 expression  
203 (**Figure 3A**). Increased proliferation was confirmed by increased EdU incorporation of 1 $\Delta$   
204  $\Delta$ NF1 cells (**Figure 3B**). To confirm effects of P2RY14 in this setting, we treated 1 $\Delta$  iHSCs  
205 (wildtype for NF1) and 1 $\Delta$  $\Delta$ NF1 (NF1 deficient cells) with 10uM of a potent P2RY14-  
206 specific UDP agonist (MRS2690), 500nM of the P2RY14 inhibitor (PPTN), and 200uM  
207 IBMX (an inhibitor of PDEs). We measured phosphorylated cAMP response element

208 binding protein (pCREB) as an indirect readout of cAMP. In  $1\lambda$  iHSCs, addition of the  
209 P2RY14 inhibitor increased pCREB expression, as expected, since inhibition of P2RY14  
210 releases  $G_i$  mediated inhibition of adenylate cyclase (AC), increasing intracellular levels  
211 of cAMP. In the absence of the P2RY14 inhibitor but in the presence of the potent  
212 P2RY14-specific UDP agonist (MRS2690), we observed a decreased in pCREB  
213 expression, confirming that upon activation by UDP, P2RY14 acts through  $G_i$  to inhibit  
214 AC and decrease cAMP (**Figure 3C**). In  $1\lambda\Delta NF1$  cells, addition of the P2RY14 inhibitor  
215 similarly increased pCREB expression. However, while in wild type cells activation of  
216 P2RY14 with MRS2690 in  $1\lambda$  cells decreased pCREB expression, in  $1\lambda\Delta NF1$  cells, the  
217 increased expression was maintained upon addition of the potent P2RY14-specific UDP  
218 agonist (**Figure 3C**), suggesting that activation of P2RY14 resulted in sustained pCREB,  
219 even in the presence of agonist (**Figure 3C**). To test if NF1 regulates cAMP directly we  
220 tested non-immortalized mouse primary SCs. *WT* mouse primary SCs showed elevated  
221 levels of basal cAMP compared to isogenic *Nf1*<sup>-/-</sup> SCs. Activation of AC via forskolin  
222 stimulation increased cAMP in *WT* SCs, but to a lesser extent in *Nf1*<sup>-/-</sup> SCs  
223 (**Supplemental figure 3E**). Based on these results, in both immortalized SCs and mouse  
224 primary SCs, NF1 alters cAMP signaling.

225         Given that EGFR and P2RY14 similarly modulate SCP self-renewal, we  
226 hypothesized that P2RY14 inhibition might affect EGFR downstream signaling. To test  
227 this idea, we treated  $1\lambda$  and  $1\lambda\Delta NF1$  with epidermal growth factor (EGF), with and without  
228 the P2RY14 inhibitor (PPTN). We monitored EGFR-phosphorylation at the Grb2  
229 activation site to measure EGFR activation, and examined downstream signaling with  
230 pERK1/2 and phosphorylation of Akt at the threonine 308 (T308) activation site (Vincent,

231 et al., 2011). In  $1\lambda\Delta NF1$  cells, P2RY14 inhibition reduced phosphorylation of EGFR at the  
232 Grb2 activation site and shortened the duration of p-AKT signaling (**Figure 3D**;  
233 **Supplemental figure 4**). Similar results were seen in the *NF1* deficient MPNST cell line,  
234 ST88-14 (**Figure 3E-3F**). To explain these results, we hypothesized that P2RY14 might  
235 form a complex with EGFR. To test this idea, we transfected ST88-14 cells with P2RY14-  
236 GFP and/or EGFR-myc tagged proteins. Then, we immunoprecipitated EGFR using an  
237 anti-myc antibody and detected P2RY14 in a complex with anti-GFP EGFR (**Figure 3G**).  
238 **P2RY14 is expressed *in vivo* in mouse SCPs and SCs.** In the *Nf1 fl/fl; Dhh+*  
239 neurofibroma mouse model, Cre recombinase is expressed from Desert Hedgehog (*Dhh*)  
240 regulatory sequences to effect recombination of the *Nf1 fl/fl* allele, resulting in loss of both  
241 *Nf1* alleles in developing SCPs at embryonic day 12.5 (Wu et al., 2008). *Nf1 fl/fl; Dhh+*  
242 mice develop paraspinal neurofibromas that have loss of axon-Schwann cell interaction  
243 in Remak bundles, mast cell and macrophage accumulation, and nerve fibrosis, all  
244 characteristics of human plexiform neurofibromas (Wu et al., 2008; Liao, et al., 2018;  
245 Fletcher, et al., 2019(a); Fletcher, et al., 2019 (b)). In this setting, plexiform neurofibromas  
246 are present by 4-months of age, and neurofibromas enlarge as the mice age, ultimately  
247 compressing the spinal cord causing paralysis and thus, necessitating sacrifice (Wu et  
248 al., 2008). We bred *P2RY14<sup>-/-</sup>* mice (Meister et al., 2014) to generate *P2RY14<sup>-/-</sup>*  
249 *; Nf1 fl/fl; Dhh+* and *P2RY14<sup>+/-</sup>; Nf1 fl/fl; Dhh+* littermates, and *Nf1 fl/fl Dhh+* controls (**Figure**  
250 **4A**). Genotyping and western blotting verified reduced P2RY14 in *P2RY14<sup>-/-</sup>; Nf1 fl/fl; Dhh+*  
251 sciatic nerve and neurofibroma tumors compared to *Nf1 fl/fl Dhh+* controls (**Figure 4B &**  
252 **4C**). In the *P2RY14<sup>-/-</sup>* mice, most of the coding region of P2RY14 is replaced by a  $\beta$ -  
253 galactosidase cassette, so that where the P2RY14 gene is expressed,  $\beta$ -galactosidase is

254 detectable (Meister et al., 2014). We visualized P2RY14 in SOX-10 positive SCPs in the  
255 spinal cord dorsal and ventral roots (VR) and in the dorsal root ganglion (DRG) of  
256 embryonic 12.5 mice (**Figure 4D & 4E**). *P2RY14<sup>-/-</sup>;Nf1fl/fl;Dhh+* SCs in 7-month old mice  
257 were also positive for  $\beta$ -galactosidase staining (**Figure 4F**). CNPase (2', 3' cyclic  
258 nucleotide 3' phosphodiesterase), a known SC marker, co-localized with  $\beta$ -galactosidase  
259 staining in the sciatic nerve (**Figure 4F, inset**). P2RY14 antibody staining confirmed  
260 P2RY14 expression in myelinating SC in mouse *WT* nerve and in *Nf1fl/fl;Dhh+*  
261 neurofibromas (**Figure 4G**).

262 **P2RY14 deletion in mouse model of neurofibroma increases survival, delays**  
263 **neurofibroma initiation, and rescues SC Remak bundle disruption.** Kaplan Meier  
264 survival analysis showed that *P2ry14<sup>-/-</sup>;Nf1fl/fl;Dhh+* have a significant survival advantage  
265 compared to neurofibroma-bearing mice (*Nf1fl/fl;Dhh+*;  $p=0.0256$ ). In fact, *P2RY14<sup>-/-</sup>*  
266 *;Nf1fl/fl;Dhh+* did not differ significantly from non-neurofibroma bearing *Nf1fl/+;Dhh+*  
267 control littermates ( $p=0.1367$ ) (**Figure 5A**). To test if *P2RY14* deletion plays a role in  
268 neurofibroma initiation, we analyzed *Nf1fl/fl;Dhh+* and *P2RY14<sup>-/-</sup>;Nf1fl/fl;Dhh+* mice to 4-  
269 months of age, when tumor are first detectable. Gross dissection of spinal cords from  
270 these mice showed that *P2RY14<sup>-/-</sup>;Nf1fl/fl;Dhh+* have decreased neurofibroma number,  
271 consistent with a role in tumor initiation, and only slightly reduced neurofibroma diameter  
272 (**Supplemental figure 5A, 5B, 5C**). Ki67 and H&E staining of neurofibromas in these 4-  
273 month-old mice showed no evident changes between genotypes in cell proliferation or  
274 cell morphology (**Supplemental figure 5D-5F**). To determine if the effects of P2RY14  
275 persist, we aged *Nf1fl/fl;Dhh+* and *P2RY14<sup>-/-</sup>;Nf1fl/fl;Dhh+* mice to 7-months. *P2RY14<sup>-/-</sup>*  
276 *;Nf1fl/fl;Dhh+* mice also showed significantly fewer neurofibromas compressing the spinal

277 cord on gross dissection (**Figure 5B, 5C**), and tumor diameter was reduced to a lesser  
278 degree (**Figure 5D**). By this age, *P2RY14* loss decreased SC proliferation in  
279 neurofibroma tissue sections, at least in part in CNPase<sup>+</sup> SCs (**Figure 5E-5F**;  
280 **Supplemental Figure 5G**) yet H&E staining retained characteristic cell morphology  
281 (**Supplemental figure 5H**). Confirming potential relevance of *P2RY14* in SCs, *P2RY14*  
282 protein was detected in membranes of myelinating SCs in human neurofibromas tissue  
283 sections (**Figure 5G**).

284 To determine if cAMP is affected by loss of *P2RY14* in tumors, we stained with anti  
285 p-PKA substrate antibody. *Nf1fl/fl;Dhh+* nerves showed a decrease in p-PKA substrate  
286 phosphorylation versus wild-type mice. Remarkably, this decrease was reversed in  
287 *P2RY14<sup>-/-</sup>;Nf1fl/fl;Dhh+* nerves (**Figure 5H**). pPKA labeling co-localized with CNPase,  
288 suggesting that the changes in p-PKA substrate phosphorylation expression, are at least  
289 in part, in nerve SCs (**Figure 5H, insets**). Conversely, p-ERK was modestly increased by  
290 loss of *P2RY14* in *Nf1fl/fl;Dhh+* mice (**Figure 5I**). Based on these results, we conclude  
291 that *P2RY14* deletion *in vivo* in neurofibroma mice increases mouse survival and delays  
292 neurofibroma initiation, with lesser effects on SC proliferation. Importantly, deletion of  
293 *P2RY14* also rescues reduced PKA mediated phosphorylation in *Nf1fl/fl;Dhh+* SCs.

294 To study an additional SC phenotype in these mice, we examined the effects of  
295 *P2RY14* loss on nerve disruption phenotype using electron microscopy. At 4-months-old  
296 *Nf1fl/fl;Dhh+* mice already had disrupted Remak bundles (reduced numbers of axons  
297 ensheathed by individual SCs); this phenotype was rescued in *P2RY14<sup>-/-</sup>;Nf1fl/fl;Dhh+*  
298 mice (**Supplemental figure 6A, 6C**). By 7-months, *Nf1fl/fl;Dhh+* nerves were even more  
299 severely disrupted, and rescued to near wild-type levels by *P2RY14* loss (**Supplemental**

300 **figure 6B, 6D).** We conclude that genetic knockout of P2RY14 in neurofibroma bearing  
301 mice rescues the nerve Remak bundles defects characteristic of neurofibroma bearing  
302 mice.

303 **Increasing cAMP in neurofibroma bearing mice by means of rolipram treatment**  
304 **decreases SC proliferation in neurofibromas.** To test if cell proliferation in *Nf1fl/fl;Dhh+*  
305 neurofibromas is affected by changes in cAMP levels, *Nf1fl/fl;Dhh+* mice were treated  
306 with vehicle or 5mg/kg rolipram (**Figure 6A**). All mice survived rolipram treatment without  
307 significant weight loss. Rolipram treated neurofibroma mice tumors lysates showed  
308 increases in p-PKA substrate phosphorylation (**Figure 6B**). Neurofibroma volume in  
309 *Nf1fl/fl;Dhh+* mice treated with rolipram did not significantly differ from controls (**Figure**  
310 **6C**), consistent with the idea that P2RY14 plays a major role in tumor initiation and a  
311 minor role in neurofibroma growth. However, cell proliferation (Ki67 staining) in tissue  
312 sections showed that rolipram treated mice have decreased cell proliferation *in vivo*  
313 (**Figure 6D**), although they did not show a significant decrease in tumor volume. These  
314 results are consistent with the idea that reduction in neurofibroma cell proliferation is at  
315 least in part mediated by cAMP, as increases in cAMP by addition of rolipram, like loss of  
316 P2RY14, decreases neurofibroma cell proliferation. Together, these studies show that the  
317 G-protein P2RY14 is a key regulator of neurofibroma initiation, and that P2RY14  
318 modulates EGFR-driven self-renewal, and SCP/SC cAMP signaling.

319 **Discussion** (7,266 characters)

320 GPCR-mediated regulation of cAMP occurs upon *NF1* loss in mammals  
321 (Dasgupta, Dugan, & Gutmann, 2003; Deraredj Nadim, et al., 2016), fish, and drosophila  
322 (Tong, et al., 2002; Wolman et al., 2014). In these systems, PACAP receptors and

323 serotonin receptors have been identified as GPCRs that act upstream of NF1 (Anastasaki  
324 & Gutmann, 2014; Deraredj Nadim et al., 2016). However, the potential role of cAMP in  
325 neurofibroma remains unclear. Targeting GPCR signaling has been suggested as a  
326 potential therapeutic option to treat NF1, so exploring the relevance of this pathway to  
327 peripheral nerve tumors is important.

328 We found that human neurofibroma derived-SCP-like cells sorted for G-protein  
329 coupled receptor P2RY14 expression have increased self-renewal potential. Adult  
330 peripheral nerves do not contain a stem cell population (Stierli, et al., 2018). Therefore,  
331 neurofibroma SCP-like cells may result from persistence of immature cells and/or from  
332 de-differentiation of mutant Schwann cells. In either case, neurofibroma also contain cells  
333 that also express P2RY14. Our findings are entirely consistent with findings that  
334 hematopoietic stem/progenitor cells marked by P2RY14 stimulate self-renewal (Lee, et  
335 al., 2003; Cho, et al., 2014; Holmfeldt, et al., 2016).

336 Purinergic receptor P2RY14 is activated by UDP and by the nucleotide sugars  
337 UDP-glucose, UDP-galactose, UDP-glucuronic acid and UDP-N-acetylglucosamine  
338 (Chambers et al., 2000; Moore et al. 2003; Abbracchio et al., 2003; Carter et al., 2009;  
339 Conroy et al., 2016). *NF1* mutant cells may release one or more of these ligands, because  
340 SCP self-renewal in serum-free medium was reduced by pharmacologic P2RY14  
341 inhibition, and by shRNA targeting P2RY14, in the absence of added UDP or UDP-  
342 sugars. The small increase in P2RY14 protein in mutant cells may contribute to increasing  
343 signaling downstream of the GPCR, and/or *Nf1* deficient cells may release more UDP-  
344 sugars than wild type cells. While it is difficult to measure UDP levels in the extracellular  
345 milieu without causing cell damage and concomitant release UDP sugars (Lazarowki &



346 Harden, 2015), it will be of interest to measure UDP and UDP-sugars both in the  
347 neurofibroma extracellular milieu, and in SCP and SC culture medium.

348 UDP, UTP, and other nucleotide sugars including UDP-glucose are present at high  
349 levels in tumor cells, and released from cells in tumors and injury sites, where they act as  
350 danger signals that trigger inflammatory responses (Eigenbrodt , Reinacher, Scheefers-  
351 Borchel, Scheefers, & Friis, 1992; Skelton, Cooper, Murphy, & Platt, 2003). We focused  
352 on the role of P2RY14 in SCs and SCPs, because most of the P2RY14 expression in  
353 peripheral nerve neurofibromas is in CNPase<sup>+</sup> myelinating Schwann cells, based on our  
354 use of a  $\beta$ -galactosidase reporter and antibody staining. However, P2RY14 is also  
355 expressed in immune cells and in small sensory neurons and larger diameter sensory  
356 neurons (Skelton, Cooper, Murphy, & Platt, 2003; Müller , et al., 2005; Scrivens and  
357 Dickenson., 2005; 2006; Malin & Molliver, 2010). In our studies, because we used a global  
358 knockout, we cannot exclude the idea that some of the observed *in vivo* effects are SCP-  
359 independent. The recent description of a conditional knockout of P2RY14 should enable  
360 additional studies (Battistone, et al., 2020).

361 In *NF1* mutant cells, pharmacological inhibition of P2RY14 also decreased  
362 activation of EGFR/ pAKT(T308) activation site in SCPs, as well as in iHSC and MPNST  
363 cells. Consistent with the idea that GPCR-receptor tyrosine kinase crosstalk occurs in the  
364 absence of *NF1*, P2RY14 loss rescued the Remak bundle disruption which is a key  
365 feature of neurofibroma SCs and is mimicked by transgenic expression of EGFR  
366 expression in Schwann cells. Cross-talk between GPCRs and EGFR (or the related  
367 receptor ErbB2) can occur through physical interaction. This may occur in *NF1*-deficient  
368 cells, as we found that P2RY14 and EGFR can form a complex after overexpression in

369 MPNST cells. Whether such a complex facilitates EGFR signaling in SCP and SCs  
370 remains to be determined.

371 Whether the decreased levels of cAMP in *NF1* deficient cells requires upstream  
372 RAS signaling is unclear (reviewed in Bergoug et al., 2020). In *NF1* mutant neurons, RAS  
373 activation of atypical protein kinase C-zeta causes GRK2-driven  $G\alpha_s$ /AC inactivation  
374 downstream of the PACAP receptor (Anastasaki & Gutmann, 2014). In fly, some  
375 investigators proposed direct regulation of AC by loss of NF1 (Tong, Hannan, Zhu,  
376 Bernards, & Zhong, 2002), but others propose that regulation is indirect (Walker &  
377 Bernards, 2014). In addition, PKA phosphorylates neurofibromin and inhibits its GAP  
378 activity (Feng, et al., 2004), suggesting potential negative feedback between NF1/RAS  
379 and PKA in wildtype cells. Furthermore, in some cell types, downstream of P2RY14/Gi/o,  
380  $Ca^{2+}$  mobilization can result in release of factors such as IL-18, which could activate RAS  
381 indirectly (Moore et al., 2003; Arase et al., 2009). All these mechanisms are candidates  
382 to explore for relevance to P2RYR14 signaling in SCPs and SCs.

383 Genetic knockdown of P2RY14 increased levels of cAMP-dependent protein  
384 kinase (PKA)-mediated phosphorylation in SCP *in vitro* and SC *in vivo*, and *NF1*<sup>-/-</sup> SCPs  
385 treated with rolipram to increase cAMP showed decreased SCP self-renewal. *In vivo*,  
386 neurofibroma bearing mice treated with rolipram showed increases in pPKA expression.  
387 These results implicate cAMP modulation as a critical P2RY14 effector in both cell types.  
388 Consistent with these findings, in wildtype cells, P2RY14/Gi/o-mediated decreases in  
389 cAMP affect chemotaxis hematopoietic of stem/progenitor cells (Lee et al., 2003; Scrivens  
390 and Dickenson, 2005). Supporting a role for P2RY14-Gi-driven suppression of cAMP  
391 levels in SCP/SC, p-PKA substrate staining was reduced in *Nf1* mutant nerves and

392 elevated by additional loss of *P2RY14*. Importantly, increasing cellular cAMP levels with  
393 rolipram mimicked the effects of inhibiting P2RY14, reducing SCP self-renewal *in vitro*  
394 and SC proliferation *in vivo*. Our findings in peripheral nerve neurofibromas are entirely  
395 consistent with those in NF1 brain tumors. Warrington et al., 2010 found that  
396 overexpression *PDE4A1* caused formation of hypercellular lesions with features of NF1-  
397 associated glioma, and rolipram inhibited optic glioma growth in an NF1-driven mouse  
398 model (Warrington, et al., 2010). Thus, rolipram treatment may be relevant to multiple  
399 NF1 manifestations.

400 In conclusion, purinergic receptor P2RY14 cAMP signaling regulates EGFR-driven  
401 Schwann cell precursor self-renewal and nerve tumor initiation in neurofibromatosis.  
402 Several groups have suggested that combined inhibition of EGFR and GPCRs could be  
403 a promising strategy in cancer therapy (Köse, 2017). P2RY14 is a candidate for this type  
404 of therapeutic intervention as a whole-body knockout of this receptor showed no effect on  
405 organismal survival or growth (Xu, et al., 2012; Meister, et al., 2014). While the P2RY14  
406 inhibitor (PPTN) has poor PK properties (Robichaud et al., 2011), when drug candidates  
407 targeting P2RY14 become available they may be useful for prevention or treatment of  
408 NF1-driven neurofibromas.

409  
410 **Acknowledgements:** We thank Takeda Cambridge Limited and Dr. Johannes Grosse  
411 for providing the P2RYR14 knock-in mouse. For excellent technical assistance we thank  
412 Mark Jackson and Lindsey E. Aschbacher-Smith. J.P-C. was supported by NIH-T32-  
413 NS007453 and a Children's Tumor Foundation Young Investigator Award. This work was  
414 supported by grants NIH-R01-NS28840 and NIH-R37-NS083580 to N.R.

415 **Author Contributions:** Conceptualization: N.R., J.P-C. Methodology: J.P-C., J.W., S.K.,  
416 R.A.C., T.A.R., K.E.C., J.A.C., R.F.H., R.R. Validation: J.P-C., J.W., S.K., R.A.C., R.F.H.,  
417 S.K. Formal Analysis: J.P-C., W.J., J.A.C., R.R. N.R., Investigation: J.P-C., J.W., S.K.  
418 Resources: N.R., R.J.S. Writing-Original Draft: J.P-C., N.R.; Writing-Review & Editing:  
419 J.P-C., J W., R.A.C., R.F.H., J.A.C. Visualization: J.P-C., J.W., R.A.F., J.A.C, N.R.;  
420 Supervision: N.R. Funding Acquisition: N.R., J.P-C.

421

422 **Competing interests:** The authors declare no competing interests.

423

424

425

426

427

428

429

430

431

432

433

434

435

436

437 **Figure 1: P2RY14 is expressed in human neurofibroma Schwann cell precursors**  
438 **and promotes SCP self-renewal *in vitro*.** A) Microarray heatmap shows P2RY14  
439 receptor expression in p75<sup>+</sup>/EGFR<sup>+</sup> SCP-like tumor initiating cells derived from human  
440 plexiform neurofibroma tumor cells compared to p75<sup>+</sup>/EGFR<sup>-</sup> SCP-like cells. B) Western  
441 blot of human Schwann cells and neurofibroma SCP shows the latter has a 1.9-fold  
442 increase in P2RY14 protein expression. C) Representative FACS plot shows live sorted  
443 human plexiform neurofibroma tumor cells. D) Representative FACS plot shows human  
444 plexiform neurofibroma tumor cells sorted into p75<sup>+</sup>/EGFR<sup>+</sup> SCP-like tumor initiating cells  
445 (pink square). E) Representative FACS plot shows p75<sup>+</sup>/EGFR<sup>+</sup> SCP-like tumor initiating  
446 cells further sorted into p75<sup>+</sup>/EGFR<sup>+</sup>/P2RY14<sup>-</sup> (left, purple square) and  
447 P75<sup>+</sup>/EGFR<sup>+</sup>/P2RY14<sup>+</sup> (right, blue square). F) Photomicrographs of human  
448 neurofibromas dissociated using FACS to yield: p75<sup>+</sup>/EGFR<sup>+</sup>/P2RY14<sup>-</sup> and  
449 P75<sup>+</sup>/EGFR<sup>+</sup>/P2RY14<sup>+</sup> cells. G) Quantification of unsorted, p75<sup>+</sup>/EGFR<sup>+</sup>/P2RY14<sup>-</sup> and  
450 P75<sup>+</sup>/EGFR<sup>+</sup>/P2RY14<sup>+</sup> cells plated in sphere medium. (n=3; two-way ANOVA; primary:  
451 \*\*p=0.0057, \*\*\*\*p<0.0001; secondary: \*p=0.0487,\*\*p<0.0024, \*\*\*\*p<0.0001;  
452 tertiary:\*p=0.0321, \*\*\*p=0.0006 ).

453 **Figure 2: Mouse *Nf1* mutant SCPs use P2RY14 signaling through G<sub>i</sub> to regulate self-**  
454 **renewal.** A) Western blot shows Nf1<sup>-/-</sup> SCPs have 1.5-fold change increase in P2RY14  
455 expression. B) Quantification of percent of sphere forming cells in mouse *WT* and *Nf1*<sup>-/-</sup>  
456 SCPs treated with the selective P2RY14 inhibitor (300nM PPTN) (primary, secondary,  
457 tertiary passage) (n=3; two-way ANOVA; primary: \*p=0.0375, \*\*\*p=0.0001, \*\*\*\*p<0.0001;  
458 secondary: \*p=0.0101, \*\*p=0.0015, \*\*\*p=0.0009; tertiary: \*p=0.0101, \*\*p=0.0050,  
459 \*\*\*p=0.0005). C) P2RY14 mRNA expression in *WT* and *Nf1*<sup>-/-</sup> E12.5 mouse SCP treated

460 with shnon-target (shNT) control and shP2RY14 (\*\*\*\* $p < 0.0001$ ). D) Western blot of *WT*  
461 and *Nf1*<sup>-/-</sup> SCPs treated with shNT and shP2RY14 showing P2RY14 knockdown. *WT*  
462 shP2RY14 show a 0.4-fold decrease of P2RY14 protein compared to *WT* shNT; and *Nf1*<sup>-/-</sup>  
463 shP2RY14 show a 0.5-fold decrease compared to *Nf1*<sup>-/-</sup>. E) Quantification of percent of  
464 sphere forming cells in mouse *WT* and *Nf1*<sup>-/-</sup> SCPs treated with shNT and shP2RY14  
465 (n=3; two-way ANOVA; primary: \* $p = 0.0288$ , \*\*\*\* $p < 0.0001$ ; secondary:  
466 \*\* $p = 0.0029$ , \*\*\* $p = 0.0005$ , \*\*\*\* $p < 0.0001$ ; tertiary: \* $p = 0.0154$ , \*\*\* $p = 0.0007$ ). F) Western blot  
467 of *WT* and *Nf1*<sup>-/-</sup> SC spheres shows 0.73-fold decrease of pERK in *WT* cells and 0.58-fold  
468 pERK decrease in *Nf1*<sup>-/-</sup> cells after P2RY14 knockdown. G) Western blot of *WT* and *Nf1*<sup>-/-</sup>  
469 SC spheres shows changes in pPKA substrate phosphorylation after shP2RY14  
470 knockdown. *WT* shP2RY14 show a 1.43-fold increase in pPKA after P2RY14 knockdown;  
471 *Nf1*<sup>-/-</sup> cells have a 1.31-fold increase in pPKA expression after P2RY14 knockdown. H)  
472 Quantification of percent of sphere forming cells in *Nf1*<sup>-/-</sup> mouse SCPs treated with 1 $\mu$ M  
473 rolipram or 300nM PPTN (n=3; two-way ANOVA; primary: \*\*\* $p = 0.0002$ , \*\*\*\* $p < 0.0001$ ;  
474 secondary \*\* $p = 0.0030$ , \*\*\*\* $p < 0.0001$ ; tertiary: \* $p = 0.0476$ , \*\*\* $p = 0.0004$ ).

475 **Figure 3: P2RY14 decreases EGFR phosphorylation suppressing EGFR-stimulated**  
476 **pERK and pAKT.** A) Growth curve of iHSC1 $\lambda$  and iHSC1 $\lambda$  NF1#1 (1 $\lambda$  $\Delta$ NF). Top right  
477 inset shows western blot confirming NF1 protein expression in iHSC 1 $\lambda$  (positive control),  
478 ipNF95.11bc SCs (negative control) and iHSC 1 $\lambda$  NF1#1 (1 $\lambda$  $\Delta$ NF) (experimental). B) EdU  
479 incorporation assay in iHSC1 $\lambda$  and iHSC1 $\lambda$  NF1#1 (1 $\lambda$  $\Delta$ NF) (\* $p < 0.001$ ). C) 1 $\lambda$  and 1 $\lambda$   
480  $\Delta$ NF1 treated with a potent 10 $\mu$ M UDP analog (P2RY14 specific agonist MRS2690),  
481 500nM of the P2RY14 inhibitor (PPTN) and 200 $\mu$ M of IBMX (n=3). Western blot show

482 changes in p-CREB expression upon treatment. D) 1 $\lambda$  and 1 $\Delta$ NF1 cells treated with the  
483 P2RY14 inhibitor (PPTN; 500nM) at different timepoints (0,5,15,30,60,120 minutes) after  
484 EGF stimulation and western blot shows changes in pEGFR-Grb2 (Y1068), total EGFR,  
485 pERK1/2, total ERK1/2, p-AKT, total AKT and  $\beta$ -actin. E) Western blot shows pERK1/2,  
486 ERK1/2 and pAKT changes in ST88-14 cells treated with different concentrations of the  
487 P2RY14 inhibitor (PPTN) (0, 62.5nM, 125nM, 250nM and 500nM of PPTN) and 20ng/mL  
488 of EGF. F) Western blot shows ST88-14 cells treated with the P2RY14 inhibitor (PPTN;  
489 500nM) and EGF (20ng/mL) and shows changes in EGFR phosphorylation at pEGFR-  
490 Grb2 (Y1068) binding site and changes in pERK and pAKT. G) ST88-14 cells transfected  
491 with P2RY14-GFP and/or EGFR-myc tagged proteins and immunoprecipitated EGFR  
492 using an anti-myc antibody shows the formation of a P2RY14 complex with EGFR.

493 **Figure 4: P2RY14 loss in mouse model of NF1 rescues reduced PKA mediated**  
494 **phosphorylation.** A) Schematic of generation of neurofibroma mice breeding of *P2RY14*<sup>-/-</sup>  
495 <sup>-/-</sup> mice with *Nf1*<sup>fl/fl</sup> mice to obtain *P2RY14*<sup>+/-</sup>;*Nf1*<sup>fl/fl</sup>;*Dhh*<sup>+</sup> and *P2RY14*<sup>-/-</sup>;*Nf1*<sup>fl/fl</sup>;*Dhh*<sup>+</sup> after  
496 several crosses. B) Genotyping confirmation of wildtype (WT) and P2RY14 knockout (KO)  
497 alleles. C) Western blot of sciatic nerve and neurofibroma tumors of *Nf1*<sup>fl/fl</sup>;*Dhh*<sup>+</sup> and  
498 *P2RY14*<sup>-/-</sup>;*Nf1*<sup>fl/fl</sup>;*Dhh*<sup>+</sup> mice show decrease in P2RY14 expression upon P2RY14  
499 knockdown (1 to 0.1-fold decrease in sciatic nerve and 1 to 0.2-fold decrease in  
500 neurofibroma tissue). D) Spinal cord (SC) immunofluorescent staining of mouse embryos  
501 at E12.5 shows P2RY14 expression ( $\beta$ -galactosidase) co-localization with SOX-10 SCs  
502 at dorsal and ventral roots (VR). E) Spinal cord (SC) immunofluorescent staining of  
503 mouse embryos at E12.5 shows P2RY14 expression ( $\beta$ -galactosidase) co-localization  
504 with SOX-10 SCs at dorsal root ganglion (DRG). E1 and E2 insets show zoomed picture

505 of DRG. F) Immunofluorescent staining of 7-month-old mouse sciatic nerve shows  $\beta$ -  
506 galactosidase positive staining as a confirmation of P2RY14 knock-in; co-labeling of  $\beta$ -  
507 galactosidase and CNPase shows that P2RY14 co-localizes with SCs (inset). G) DAB  
508 staining of 7-month old *WT* nerve and *Nf1fl/fl;Dhh+* mouse neurofibromas (DAB staining:  
509 brown (P2RY14 positive cells) blue (cell nuclei)).

510 **Figure 5: P2RY14 deletion in mouse model of neurofibroma increases survival and**

511 **delays neurofibroma initiation.** A) Kaplan Meier survival plot of *Nf1fl/fl;Dhh+* (red line;

512 *n*=8); *P2RY14<sup>+/-</sup>;Nf1fl/fl;Dhh+* (black line, *n*=14); *P2RY14<sup>-/-</sup>;Nf1fl/fl;Dhh+* (blue line; *n*=13);

513 *Nf1fl/+* control (green line, *n*=11) (\**p*=0.0256). B) Representative image of gross

514 dissection of *Nf1fl/fl;Dhh+* and *P2RY14<sup>-/-</sup>;Nf1fl/fl;Dhh+* mice at 7-months of age. C)

515 Neurofibroma tumor number quantification at 7-months of age (unpaired *t* test

516 \*\*\*\**p*<0.0001). D) Neurofibroma diameter quantification at 7-months (unpaired *t* test

517 \*\*\**p*=0.0004) (for figures C & D: *Nf1fl/fl;Dhh+* *n*=8 mice, 48 neurofibroma tumors; *P2RY14-*

518 *-/-;Nf1fl/fl;Dhh+* *n*=8 mice, 11 neurofibroma tumors). E) Ki67 staining of mouse DRG and

519 neurofibroma tissue at 7-months of age. F) Quantification of Ki67+ cells in mouse DRG

520 and neurofibroma tissue at 7-months of age (One-way ANOVA; multiple comparisons

521 \*\*\**p*=0.0008; \*\*\*\**p*<0.0001). G) Immunohistochemistry of human neurofibroma shows

522 P2RY14 expression (DAB staining: brown (P2RY14 positive cells) blue (cell nuclei)). H)

523 anti p-PKA substrate staining in *WT*, *Nf1fl/fl;Dhh+* and *P2RY14<sup>-/-</sup>;Nf1fl/fl;Dhh+* mice. p-

524 PKA substrate phosphorylation labeling co-localized with CNPase SC marker (insets). I)

525 Western blot of tissue lysates of *WT* (DRG), *Nf1fl/fl;Dhh+* (neurofibroma tumors) and

526 *P2RY14<sup>-/-</sup>;Nf1fl/fl;Dhh+* (neurofibroma tumors) show *Nf1fl/fl;Dhh+* neurofibromas have

527 1.5-fold increased p-ERK expression compared to *WT* DRGs but, p-ERK expression



528 between *Nf1fl/fl;Dhh+* (1.5-fold) and *P2RY14<sup>-/-</sup>;Nf1fl/fl;Dhh+* (1.6-fold) remained  
529 relatively unchanged.

530 **Figure 6: cAMP increase in neurofibroma bearing mice via rolipram treatment**  
531 **decreases SC proliferation in neurofibromas.** A) Rolipram drug treatment  
532 experimental design. B) Tumor lysates of vehicle and rolipram treated *Nf1fl/fl;Dhh+* mice  
533 show changes in p-PKA substrate. C) Volumetric analysis of neurofibroma volumes in  
534 *Nf1fl/fl;Dhh+* mice treated with 5mg/kg rolipram (Unpaired t-test:  $p=0.9397$ ). D) Ki67  
535 staining at 9-months of age in vehicle and rolipram treated mice. Inset shows  
536 quantification of Ki67+ cells in vehicle treated versus rolipram treated mice (unpaired t-  
537 test: \*\*\*\* $p<0.0001$ ;  $n=3$ ).

538

539

540

541

542

543

544

545

546

547

548

549

550

551 **Methods & Materials**

552 **RESOURCE AVAILABILITY**

553 **Lead Contact**

554 Further information and requests for resources and reagents should be directed to and  
555 will be fulfilled by the Lead Contact, Nancy Ratner, PhD ([nancy.ratner@cchmc.org](mailto:nancy.ratner@cchmc.org)).

556 **Materials Availability**

557 This study did not generate new unique reagents.

558 **Data and Code Availability Statement**

559 The data sets and original figures generated during this study will be available at Synapse  
560 Project (<https://www.synapse.org/>).

561 **Animals**

562 We housed mice in a temperature and humidity-controlled vivarium on a 12hr dark-light  
563 cycle with free access to food and water. The animal care and use committee of Cincinnati  
564 Children's Hospital Medical Center approved all animal use. Wild type C57Bl/6 mice were  
565 from Jackson Laboratory and were used at 4 and 7 months of age. The *Nf1fl/fl*; *Dhh*<sup>+</sup>  
566 mouse line has been described previously by (Wu et al., 2008). We bred *P2RY14*<sup>-/-</sup> male  
567 mice (Meister et. al., 2014; Takeda Cambridge Limited) with *Nf1 fl/fl* female mice to obtain  
568 the F1 generation *P2RY14*<sup>+/-</sup>; *Nf1fl/+* ; then, we bred the F1 mice with *DhhCre* male mice  
569 to obtain *P2RY14*<sup>+/-</sup>; *Nf1fl/+*; *Dhh*<sup>+</sup> Then, we bred *P2RY14*<sup>+/-</sup>; *Nf1fl/+*; *Dhh*<sup>+</sup> (males) with  
570 *P2RY14*<sup>+/-</sup>; *Nf1fl/+*; *Dhh*<sup>+</sup> (females) to obtain *P2RY14*<sup>+/-</sup>; *Nf1fl/fl*; *Dhh*<sup>+</sup> and *P2RY14*<sup>-/-</sup>  
571 ; *Nf1fl/fl*; *Dhh*<sup>+</sup>. We genotyped mice as described by (Meister et al. 2014). Littermates were  
572 used for controls. Mice of both sexes were used for all experiments.

573 **Human neurofibroma sample collection**

574 Fresh plexiform neurofibromas (n=3) were obtained after medically mandated surgeries.  
575 All samples were obtained with patient consent under IRB approval.

### 576 **FACS Analysis**

577 Fresh surgical plexiform neurofibroma (PNF) specimens were enzymatically dissociated  
578 as described (Williams et al, 2008). For cell sorting, we incubated cell suspensions with  
579 anti-P2RY14 receptor antibody (Rabbit, polyclonal, Alomone labs, # APR-018) on ice for  
580 30 minutes, washed with PBS twice. We then incubated cells with goat-anti-rabbit-APC  
581 (Southern Biotech, Cat# 4050-11S), mouse anti-human monoclonal antibodies against  
582 p75/NGFR (Becton-Dickinson, Cat# 40-1457) bound to phycoerythrin (PE), and EGFR  
583 (Fitzgerald, Acton, MA, Cat# 61R-E109BAF,) bound to FITC on ice in PBS/ 0.2% human  
584 serum for 30 min. After washing, we re-suspended cells in PBS/ 0.2% human serum  
585 containing 2 µg/mL 7-aminoactinomycin D (7-AAD) (Invitrogen, Cat# A1310). We carried  
586 out isotopic controls with irrelevant mouse IgG1-APC, mouse-IgG1-PE and mouse-IgG1-  
587 FITC in parallel. Cells were FACS-sorted using a four-laser FACSDiva (Becton-  
588 Dickinson) to acquire alive Schwann cell sub-population (P75<sup>+</sup>/EGFR<sup>+</sup>/P2RY14<sup>+</sup>/7-AAD<sup>-</sup>  
589 and P75<sup>+</sup>/EGFR<sup>+</sup>/P2RY14<sup>-</sup>/7-AAD<sup>-</sup>). Three primary human PNFs were FACS-sorted  
590 independently.

### 591 **Western blotting**

592 Primary antibodies and dilutions were: Anti-Purinergic Receptor P2RY14 rabbit  
593 (extracellular) (1:200, Sigma Aldrich, Cat#: P0119); GPR105 Polyclonal antibody rabbit  
594 (1:200, Thermo Fisher, Cat#: PA5-34087); phospho PKA substrate (RRXS\*/T\*) (100G7E)  
595 rabbit (1:1000, Cell Signaling Technology, Cat#: 9624S); phosphor-p44/42 MAPK  
596 (Erk1/2) (Thr202/Tyr204) rabbit (1:1000, Cell Signaling Technologies, Cat#: 8544S);

597 P44/42 MAPK (Erk1/2) (137F5) rabbit mAB (1:1000, Cell Signaling Technologies, Cat#:  
598 4695S).

### 599 **Sphere culture**

600 We dissociated DRG from E12.5 embryos with 0.25% Trypsin (Thermo Fisher, Cat#  
601 25200056) for 20 min at 37 °C and obtained single-cell suspensions with narrow-bore  
602 pipettes and a 40 µm strainer (BD-Falcon), plating the cells in 24 well low attachment  
603 plates (Corning). The free-floating cells were cultured in serum-free medium with EGF  
604 and FGF as described (Williams et al. 2008). For passage, we dissociated spheres with  
605 0.05% Trypsin (Thermo Fisher, Cat# 25300054) at 37 °C for 5 min. For shRNA treatment  
606 and sphere counts, we plated SCP cells at low density to avoid sphere fusion (1000  
607 cells/well in 24 well plates). In the P2RY14 drug studies, we treated the cells with P2RY14  
608 inhibitor: P2RY14 Antagonist Prodrug 7j hydrochloride (Axon Medchem, Cat# 1958) at  
609 concentrations of 30nM, 100nM, 300nM and 500nM. Three biological replicates produced  
610 similar results. Dose response analysis confirmed that the optimal concentration of PPTN  
611 was 300nM in this assay. For the shRNA experiments, we treated cells with three  
612 different lentiviral particles: shRNA control plasmid DNA (Sigma-Aldrich, Cat# SHC016-  
613 1EA), shP2RY14(09) (Sigma-Aldrich, Cat# SHCLNG-NM\_133200; TRCN0000328609),  
614 shP2RY14(84) (Sigma-Aldrich, Cat# SHCLNG-NM\_133200; TRCN0000328684),  
615 shP2RY14(64) (Sigma-Aldrich, Cat# SHCLNG-NM\_133200; TRCN0000026664) at MOI  
616 = 10, 24 h after plating. For rolipram experiment, we treated cells with 1µM rolipram  
617 (Selleck, Cat# S1430). To passage, we centrifuged sphere cultures, treated with 0.05%  
618 Trypsin for 3 min., dissociated and plated at  $2 \times 10^4$  cells/ml in 50% conditioned and 50%  
619 fresh medium. We counted secondary spheres after 14 days. For every cell line three

620 biological replicates with three technical replicates were done. Of the three biological  
621 replicates the best one was reported as a representative (n=3). Spheres were counted  
622 with an inverted phase contrast microscope after 6 days of plating.

### 623 **Primary SC culture**

624 Embryonic day 12.5 primary mouse SCs (mSC) were isolated from dorsal root ganglia  
625 (DRG) with neuronal contact in N2 medium with nerve growth factor, then removed from  
626 neurons and cultured in SC media (DMEM (Thermo Fisher, Cat# 11965118) + 10% FBS  
627 (Gemini Bio-Products, Cat# A87G02J) +  $\beta$ -heregulin peptide (R&D Systems, Cat# 396-  
628 HB-050) + forskolin (Cayman Chemical, Cat# 11018)) for 1–3 passages as described  
629 (Kim, Roseanbaum, Marchionni, Ratner, & DeClue, 1995).

### 630 **CRISPR/Cas9 immortalized human SCs (IHSC-1 $\lambda$ )**

631 The immortalized human Schwann iHSC-1 $\lambda$  were infected with lentivirus derived from  
632 pLentiCRISPRv2 puro (Addgene, Cat#78852) expressing Cas9 and either a scrambled  
633 gRNA or one directed against the human NF1 gene designed to cleave between amino  
634 acids 157 and 158 in Exon 4. Pooled puromycin resistant cells were evaluated for NF1  
635 expression by western blot (Bethyl Laboratories, Cat#A300-140A) and growth and EdU  
636 incorporation assays were performed. gRNA #1: 5'-CAGTCTTTAGTCGCATTTCTACC-  
637 3': Target Exon 4, cut site between aa 157 and 158. gRNA #2: 5'-  
638 ACACTGGAAAATGTCTTGC-3': Target Exon 3, cut site at aa 94.

### 639 **Immortalized SCs P2RY14 mechanistic experiment**

640 Immortalized human SCs were treated plated in 6-well plates (200,000 cells per well) in  
641 DMEM +10%FBS + P/S (Penicillin). After cells were confluent, cells were treated with  
642 serum free media for 4 hours. At the 3-hour time-point, cells were treated with 200uM

643 IBMX (Millipore Sigma, Cat.# I5879) for 1 hour. At the 3.5-hour time-point, cells were  
644 treated with the 500nM PPTN inhibitor for 30 minutes. At the 4-hour time-point, cells were  
645 stimulated with 10uM UDP analog MRS2690 (Tocris, Cat. #: 2915) for 15 mins. Cells  
646 were collected in RIPA buffer, denatured and used to run western blot. For every cell line  
647 three biological replicates with three technical replicates were done. Of the three  
648 biological replicates the best one was reported as a representative (n=3).

#### 649 **Direct cAMP ELISA assay**

650 Primary Schwann cells were plated on poly-L-lysine coated 6 well plate (~750,000 cells  
651 per well) in DMEM + 10 % FBS +  $\beta$  HRG + forskolin. After cells were confluent, cells were  
652 starved with serum-free N2 media with N2 supplement and left incubating for 16 hours.  
653 Cells were pre-incubated with MEK inhibitor for two hours prior to stimulation. Stimulation  
654 was carried out for 2 minutes and cAMP measurement was done according to  
655 manufacturer's protocol (Direct cAMP ELISA kit by Enzo Life Sciences, Cat# ADI-900-  
656 066) using the acetylated format. An aliquot prior to cAMP measurements was set aside  
657 for protein quantification using the Bio-Rad protein assay kit. For every cell line two  
658 biological replicates with three technical replicates were done. Of the two biological  
659 replicates the best one was reported as a representative (n=3 biological replicates, 3  
660 technical replicates).

#### 661 **Immunostaining**

662 For frozen sections, OCT was removed by incubation with 1XPBS. We permeabilized  
663 cells in ice cold MeOH for 10 min., followed by incubation in normal donkey serum  
664 (Jackson ImmunoResearch Cat# 017-000-121) and 0.3% Triton-X100 (Sigma-Aldrich  
665 Cat# X100). Ki67 (1:200, Cell Signaling Technologies Cat# 12202S), anti-CNPase

666 (1:250, Sigma Aldrich Millipore, Cat# AB9342);  $\beta$ -galactosidase polyclonal antibody  
667 (1:1000, Thermo Fisher, Cat#: A-11132);  $\beta$ -actin (13E5) Rabbit mAb (HRP Conjugate)  
668 (1:1000, Cell Signaling, Cat#: 5125S). All secondary antibodies were donkey anti  
669 Rat/Rabbit/Goat from Jackson ImmunoResearch, reconstituted in 50% glycerol and used  
670 at 1:250 dilution. To visualize nuclei, sections were stained with DAPI for 10min., washed  
671 with PBS and mounted in FluoromountG (Electron Microscopy Sciences, Hatfield, PA).  
672 Images were acquired with ImageJ Acquisition software using a fluorescence microscope  
673 (Axiovert 200M) with 10x/0.4 or 40x/0.6 objectives (Carl Zeiss, Inc.), or with NIS-Elements  
674 software using confocal microscopy (Nikon).

#### 675 **Electron Microscopy**

676 Mice were perfusion fixed with 4% paraformaldehyde and 2.5% glutaraldehyde in 0.1-M  
677 phosphate buffer at 7.4 pH. Saphenous nerve was dissected out and postfixed overnight,  
678 then transferred to 0.175 mol/L cacodylate buffer, osmicated, dehydrated, and embedded  
679 in Embed 812 (Ladd Research Industries). Ultrathin sections were stained in uranyl  
680 acetate and lead citrate and viewed on a Hitachi H-7600 microscope.

#### 681 **Mouse dissection and quantification of neurofibroma number and size**

682 To quantify neurofibroma number and size, we perfused mice and used a Leica dissecting  
683 microscope to dissect the spinal cord with attached DRG and nerve roots at the ages of  
684 4-months and 7-month, as previously described (Wu, et al., 2016). A neurofibroma was  
685 defined as a mass surrounding the DRG or nerve roots, with a diameter greater than  
686 1mm, measured perpendicular to DRG/nerve roots. Neurofibroma diameter for each  
687 mouse were measured with Image J.

#### 688 **RT-PCR**

689 We isolated total RNA from WT and Nf1<sup>-/-</sup> spheres treated with shP2RY14 using the  
690 RNeasy Plus Micro-Kit (QIAGEN, Cat# 74034) and made cDNA using the High Capacity  
691 Reverse Transcription Kit (Thermo Fisher, Cat# 4368813). We conducted rt-PCR as  
692 described in (Williams et al. 2008). Primer sequence: P2RY14 forward: 5'-  
693 AGCAGATCATTCCCGTGTGT-3'. P2RY14 reverse: 5'-  
694 TCTCAAGAACATAGTGGTGGCT-3'.

### 695 **Genotyping**

696 Power SYBR Green PCR Master Mix (Thermo Fisher, Cat# 4368702) was used for  
697 genotyping. We genotyped mice as described by (Meister et al. 2014). Genotyping  
698 primers: b-galactosidase sense: 5'-AGAAGGCACATGGCTGAATATCGA-3'. P2RY14  
699 forward: (5'-AGCTGCCGGACGAAGGAGACCCTGCTC-3'. P2RY14 reverse: 5'-  
700 GGTTTTGGAAACCTCTAGGTCATTCTG- 3' (Meister et al., 2014).

### 701 **Statistics**

702 Statistical parameters, including the type of tests, number of samples (n), descriptive  
703 statistics and significance are reported in the figures and figure legends. Two-group  
704 comparisons used Student's t-tests. When single agents were tested at different  
705 concentration in a single cell type, we used a one-way ANOVA with a Dunnett's multiple  
706 comparisons test. When multiple genotypes were analyzed in a single experiment, we  
707 used a Two-way ANOVA with multiple comparisons, without matching, and correction  
708 with the Holm-Sidak test. Mann-Whitney test was used for comparisons between  
709 genotypes for tissue widths and neurofibroma incidence (GraphPad Prism V9). All data  
710 unless otherwise stated is represented as average  $\pm$  SD, and was analyzed in GraphPad  
711 Prism 7.



712 **Supplemental figure 1: Photomicrographs of three different experiments in which**  
713 ***WT* and *Nf1*<sup>-/-</sup> SCPs were treated with PPTN, shP2RY14 and rolipram.** A)  
714 Photomicrographs of *WT* and *Nf1*<sup>-/-</sup> mouse SC spheres treated with the selective  
715 P2RY14 inhibitor (PPTN; 300nM). B) Photomicrographs of *WT* and *Nf1*<sup>-/-</sup> mouse SC  
716 spheres treated with shNT and shP2RY14 (09). C) Photomicrographs of *NF1*<sup>-/-</sup> SCPs  
717 treated with vehicle and 1uM of rolipram.

718 **Supplemental figure 2: PPTN dose response analysis in *WT* and *Nf1*<sup>-/-</sup> SCPs.** A)  
719 Photomicrographs of *WT* and *Nf1*<sup>-/-</sup> mouse SC spheres treated with the P2RY14 inhibitor  
720 (PPTN; 30nM). B) Photomicrographs of *WT* and *Nf1*<sup>-/-</sup> mouse SC spheres treated with  
721 the P2RY14 inhibitor (PPTN; 100nM). C) Photomicrographs of *WT* and *Nf1*<sup>-/-</sup> mouse SC  
722 spheres treated with the P2RY14 inhibitor (PPTN; 500nM). (Note: for figures S2A-C, the  
723 same *WT* and *Nf1*<sup>-/-</sup> vehicle controls photomicrographs are used for each dose). D)  
724 Quantification of the percent of sphere forming cells after treatment with the P2RY14  
725 inhibitor (PPTN; 30nM) in *WT* and *Nf1*<sup>-/-</sup> mouse SC spheres (two-way ANOVA: primary  
726 and secondary passage: \*\*\*\*p<0.0001, tertiary passage: \*p=0.0168, \*\*p=0.0074) E)  
727 Quantification of percent sphere forming cells after treatment with the P2RY14 inhibitor  
728 (PPTN;100nM) in *WT* and *Nf1*<sup>-/-</sup> mouse SCP (two way ANOVA: primary, secondary and  
729 tertiary passage: \*\*\*\*p<0.0001). F) Quantification of percent sphere forming cells after  
730 treatment with the P2RY14 inhibitor (PPTN; 500nM) in *WT* and *Nf1*<sup>-/-</sup> mouse SCP; results  
731 show that this concentration was toxic to the cells (two way ANOVA: primary, secondary  
732 and tertiary passage: \*\*\*\*p<0.0001).

733 **Supplemental figure 3: Photomicrographs and quantification analysis of two**  
734 **biological replicates of shP2RY14 in *WT* and *Nf1*<sup>-/-</sup> SCPs.** A) Photomicrographs of

735 *WT* and *Nf1*<sup>-/-</sup> SCP treated with shP2RY14 (64). B) Quantification of the percent of sphere  
736 forming cells in *WT* and *Nf1*<sup>-/-</sup> SCP after treatment with shP2RY14 (64) (n=3; two-way  
737 ANOVA: primary: \*p=0.0184, \*\*\*\*p<0.0001; secondary: \*p=0.0270, \*\*p=0.0024; tertiary:  
738 \*p=0.0270, \*\*p=0.0078). C) Photomicrographs of *WT* and *Nf1*<sup>-/-</sup> SCP treated with  
739 shP2RY14 (84). D) Quantification of the percent of sphere forming cells in *WT* and *Nf1*<sup>-/-</sup>  
740 SCP after treatment with shP2RY14 (84) (n=3; two-way ANOVA: primary: \*\*\*p=0.0005,  
741 \*\*\*\*p<0.0001; secondary: \*p=0.0358; tertiary: \*p=0.0245, \*\*p=0.0030). (Note: for figures  
742 S3A & S3C, the same *WT* and *Nf1*<sup>-/-</sup> shNT control photomicrographs are used). E) *WT*  
743 and *Nf1*<sup>-/-</sup> E12.5 mouse SCs cAMP levels measured at baseline and after activation of  
744 AC via forskolin stimulation (n=3, multiple t-test: vehicle \*p=0.0407, forskolin (5uM)  
745 \*p=0.0045).

746 **Supplemental figure 4: Quantification of 1λ and 1λΔNF1 cells treated with PPTN and**  
747 **EGF.** A) Graph shows total EGFR and pEGFR (Grb2) dynamics overtime after addition  
748 of EGF in vehicle treated 1λ cells. B) Graph shows total EGFR and pEGFR (Grb2)  
749 dynamics overtime after addition of EGF in P2RY14 inhibitor (PPTN) treated 1λ cells. C)  
750 Graph shows total EGFR and pEGFR (Grb2) dynamics overtime after addition of EGF in  
751 vehicle treated 1λΔNF1 cells. D) Graph shows total EGFR and pEGFR (Grb2) dynamics  
752 overtime after addition of EGF in P2RY14 inhibitor (PPTN) treated 1λΔNF1 cells. E) Graph  
753 shows pERK1/2 and pAKT dynamics overtime after addition of EGF in vehicle treated 1λ  
754 cells. F) Graph shows pERK1/2 and pAKT dynamics overtime after addition of EGF in

755 P2RY14 inhibitor (PPTN) treated 1λ cells. G) Graph shows pERK1/2 and pAKT dynamics  
756 overtime after addition of EGF in vehicle treated 1λΔNF1 cells. H) Graph shows pERK1/2  
757 and pAKT dynamics overtime after addition of EGF in P2RY14 inhibitor (PPTN) treated 1  
758 λΔNF1 cells.

759 **Supplemental figure 5: Tumor dissection of *Nf1fl/fl;Dhh+* and *P2RY14<sup>-/-</sup>;***  
760 ***Nf1fl/fl;Dhh+* mice at 4-months and immunostaining analysis of 4-months and 7-**  
761 **months sciatic nerve and tumors.** A) Representative image of gross dissection of  
762 *Nf1fl/fl;Dhh+* and *P2RY14<sup>-/-</sup>;**Nf1fl/fl;Dhh+* mice at 4-months. B) Neurofibroma tumor  
763 number quantification at 4-months of age (unpaired t-test \*\*p=0.0052). C) Neurofibroma  
764 tumor diameter quantification at 4-months (unpaired t-test \*\*p=0.0489) (for figures B & C:  
765 *Nf1fl/fl;Dhh+* n=5 mice, 19 neurofibroma tumors; *P2RY14<sup>-/-</sup>;**Nf1fl/fl;Dhh+* n=5 mice; 5  
766 neurofibroma tumors). D) Ki67 staining of *Nf1fl/fl;Dhh+* and *P2RY14<sup>-/-</sup>;**Nf1fl/fl; Dhh+*  
767 neurofibromas at 4-months of age. E) Quantification of percent of Ki67 positive cells in  
768 *Nf1fl/fl;Dhh+* and *P2RY14<sup>-/-</sup>;**Nf1fl/fl;Dhh+* 4-months old mice (t-test; n.s.). F) H&E staining  
769 at 4-months in *Nf1fl/fl;Dhh+* and *P2RY14<sup>-/-</sup>;**Nf1fl/fl;Dhh+* mice. G) Ki67  
770 immunofluorescence co-labeling with CNPase (SC marker) in 7-months sciatic nerve. H)  
771 H&E tumor staining at 7-months in *Nf1fl/fl;Dhh+* and *P2RY14<sup>-/-</sup>;**Nf1fl/fl;Dhh+* mice.

772 **Supplemental figure 6: P2RY14 deletion improves nerve ultrastructure.** A) Electron  
773 micrograph of saphenous nerve of 4-months *WT*, *Nf1fl/fl;Dhh*, *P2RY14<sup>-/-</sup>;**Nf1fl/fl;Dhh+*  
774 and *P2RY14<sup>-/-</sup>* mice. B) Electron micrograph of saphenous nerve of 7-months *WT*,  
775 *Nf1fl/fl;Dhh* and *P2RY14<sup>-/-</sup>;**Nf1fl/fl; Dhh+* mice. C) Remak bundle quantification at 4-

776 months of age (n=3; two way ANOVA: \*\*\*\*p<0.0001). D) Remak bundle quantification at  
777 7-months of age (n=3; two way ANOVA: \*\*p=0.0027, \*\*\*\*p<0.0001).

## 778 Bibliography

- 779 Abbracchio, M. P., Boeynaems, J.-M., Barnard, E. A., Boyer, J. L., Kennedy, C., Miras-  
780 Portugal, M. T., . . . Burnstock, G. (2003). Characterization of the UDP-glucose receptor  
781 (re-named here the P2Y14 receptor) adds diversity to the P2Y receptor family. *Cell*  
782 *Press*, 52-55.
- 783 Abbracchio, M. P., & Ceruti, S. (2006). Roles of P2 receptors in glial cells: focus on astrocytes.  
784 *Purinergic Signaling*, 595–604.
- 785 Anastasaki, C., & Gutmann, D. H. (2014). Neuronal NF1/RAS regulation of cyclic AMP  
786 requires atypical PKC activation. *Human Molecular Genetics*, 6712-6721.
- 787 Arase, T., Uchida, H., Kajitani, T., Ono, M., Tamaki, K., Oda, H., . . . Maruyama, T. (2009). The  
788 UDP-glucose receptor P2RY14 triggers innate mucosal immunity in the female  
789 reproductive tract by inducing IL-8. *The Journal of Immunology*, 7074-7084.
- 790 Ballester, R., Marchuk, D., Boguski, M., Saulino, A., Letcher, R., Wigler, M., & Collins, F.  
791 (1990). The NF1 locus encodes a protein functionally related to mammalian GAP and  
792 yeast IRA proteins. *Cell*, 851-859.
- 793 Battistone, M. A., Mendelsohn, A. C., Spallanzani, R. G., Allegretti, A. S., Liberman, R. N.,  
794 Sesma, J., . . . Breton, S. (2020). Proinflammatory P2Y14 receptor inhibition protects  
795 against ischemic acute kidney injury in mice. *Journal of Clinical Investigation*, 3734–  
796 3749.
- 797 Bergoug, M., Doudeau, M., Godin, F., Mosrin, C., Vallée, B., & Bénédicti, H. (2020).  
798 Neurofibromin Structure, Functions and Regulation. *Cells*, 1-32.
- 799 Carter, R. L., Fricks, I. P., Barrett, M. O., Burianek, L. E., Zhou, Y., Ko, H., . . . Harden, T.  
800 (2009). Quantification of Gi-mediated inhibition of adenylyl cyclase activity reveals that  
801 UDP is a potent agonist of the human P2Y14 receptor. *Molecular Pharmacology*, 1341-  
802 1348.
- 803 Chambers, J. K., Macdonald, L. E., Sarau, H. M., Ames, R. S., Freeman, K., Foley, J. J., . . .  
804 et al. (2000). A G protein-coupled receptor for UDP-glucose. *Journal of Biological*  
805 *Chemistry*, 10767-10771.
- 806 Chen, Z., Liu, C., Patel, A. J., Liao, C.-P., Wang, Y., & Le, L. Q. (2014). Cells of Origin in the  
807 Embryonic Nerve Roots for NF1-Associated Plexiform Neurofibroma. *Cancer Cell*, 695-  
808 706.
- 809 Chen, Z., Mo, J., Brosseau, J.-P., Shipman, T., Wang, Y., Liao, C.-P., . . . Le, L. Q. (2019).  
810 Spatiotemporal Loss of NF1 in Schwann Cell Lineage Leads to Different Types of  
811 Cutaneous Neurofibroma Susceptible to Modification by the Hippo Pathway. *Cancer*  
812 *Discovery*, 114-129.
- 813 Cho, J., Yusuf, R., Kook, S., Attar, E., Lee, D., Park, B., . . . Chel Lee, B. (2014). Purinergic  
814 P2Y14 receptor modulates stress-induced hematopoietic stem/progenitor cell senescence.  
815 *Journal of Clinical Investigation*, 3159–3171.

- 816 Conroy, S., Kindon, N., Kellam, B., & Stocks, M. (2016). Drug-like Antagonists of P2Y  
817 Receptors—From Lead Identification to Drug Development. *Journal of Medicinal*  
818 *Chemistry*, 9981-10005.
- 819 Dasgupta, B., Dugan, L. L., & Gutmann, D. H. (2003). The Neurofibromatosis 1 Gene Product  
820 Neurofibromin Regulates Pituitary Adenylate Cyclase-Activating Polypeptide-Mediated  
821 Signaling in Astrocytes. *The Journal of Neuroscience*, 8949–8954.
- 822 DeClue, J. E., Heffelfinger, S., Benvenuto, G., Ling, B., Li, S., Rui, W., . . . Ratner, N. (2000).  
823 Epidermal growth factor receptor expression in neurofibromatosis type 1-related tumors  
824 and NF1 animal models. *Journal of Clinical Investigation*, 1233-41.
- 825 Deraredj Nadim, W., Chaumont-Dubel, S., Madouri, F., Cobreta, L., De Tauziaa, M.-L., Zajdelc,  
826 P., . . . Morisset-Lopez, S. (2016). Physical interaction between neurofibromin and  
827 serotonin 5-HT<sub>6</sub> receptor promotes receptor constitutive activity. *Proceedings of the*  
828 *National Academies of Sciences of the United States of America*, 12310–12315.
- 829 Eigenbrodt, E., Reinacher, M., Scheefers-Borchel, U., Scheefers, H., & Friis, R. (1992). Double  
830 role for pyruvate kinase type M2 in the expansion of phosphometabolite pools found in  
831 tumor cells. *Critical Reviews in Oncogenesis*, 91-115.
- 832 Erlandson, R. A., & Woodruff, J. M. (1982). Peripheral nerve sheath tumors: an electron  
833 microscopic study of 43 cases. *Cancer*, 273-287.
- 834 Feng, L., Yunoue, S., Tokuo, H., Ozawa, T., Zhang, D., Patrakitkomjorn, S., . . . Araki, N.  
835 (2004). PKA phosphorylation and 14-3-3 interaction regulate the function of  
836 neurofibromatosis type I tumor suppressor, neurofibromin. *FEBS Letters*, 275-82.
- 837 Fletcher, J. S., Springer, M. G., Choi, K., Jousma, E., Rizvi, T. A., Dombi, E., . . . Ratner, N.  
838 (2019). STAT3 inhibition reduces macrophage number and tumor growth in  
839 neurofibroma. *Oncogene*, 2876-2884.
- 840 Fletcher, J. S., Wu, J., Jessen, W. J., Pundavela, J., Miller, J. A., Dombi, E., . . . Ratner, N.  
841 (2019). Cxcr3-expressing leukocytes are necessary for neurofibroma formation in mice.  
842 *Journal of Clinical Investigation*, e98601.
- 843 Friedman, J. (1998). Neurofibromatosis 1. *Gene Reviews*, 1993–2021.
- 844 Harty, B. L., & Monk, K. R. (2017). Unwrapping the unappreciated: recent progress in Remak  
845 Schwann cell biology. *Current Opinions in Neurobiology*, 131-137.
- 846 Hegedus, B., Dasgupta, B., Shin, J., Emmett, R., Hart-Mahon, E., Elghazi, L., . . . Gutmann, D.  
847 (2007). Neurofibromatosis-1 regulates neuronal and glial cell differentiation from  
848 neuroglial progenitors in vivo by both cAMP- and Ras-dependent mechanisms. *Cell Stem*  
849 *Cell*, 443-457.
- 850 Holmfeldt, P., Ganuza, M., Marathe, H., He, B., Hall, T., Kang, G., . . . McKinney-Freeman.  
851 (2016). Functional screen identifies regulators of murine hematopoietic stem cell  
852 repopulation. *Journal of Experimental Medicine*, 433-49.
- 853 Jessen, K. R., & Mirsky, R. (2019). Schwann Cell Precursors; Multipotent Glial Cells in  
854 Embryonic Nerves. *Frontiers of Molecular Neuroscience*, 1-16.
- 855 Joseph, N. M., Mosher, J. T., Buchstaller, J., Snider, P., McKeever, P. E., Lim, M., . . . Morrison,  
856 S. J. (2008). The loss of Nf1 transiently promotes self-renewal but not tumorigenesis by  
857 neural crest stem cells. *Cancer Cell*, 129-40.
- 858 Köse, M. (2017). GPCRs and EGFR – Cross-talk of membrane receptors in cancer. *Bioorganic*  
859 *and Medicinal Chemistry Letters*, 3611–3620.

- 860 Kallionpää, R. A., Uusitalo, E., Leppävirta, J., Pöyhönen, M., Peltonen, S., & Peltonen, J.  
861 (2018). Prevalence of neurofibromatosis type 1 in the Finnish population. *Genetics in*  
862 *Medicine Nature*, 1082-1086.
- 863 Kim, A., Stewart, D. R., Reilly, K. M., Viskochil, D., Miettinen, M. M., & Widemann, B. C.  
864 (2017). Malignant Peripheral Nerve Sheath Tumors State of the Science: Leveraging  
865 Clinical and Biological Insights into Effective Therapies. *Sarcoma*, Epub.
- 866 Kim, H. A., Rosenbaum, T., Marchionni, M. A., Ratner, N., & DeClue, J. E. (1995). Schwann  
867 cells from neurofibromin deficient mice exhibit activation of p21ras, inhibition of cell  
868 proliferation and morphological changes. *Oncogene*, 325-335.
- 869 Lazarowski, E. R., & Harden, K. T. (2015). UDP-Sugars as Extracellular Signaling Molecules:  
870 Cellular and Physiologic Consequences of P2Y<sub>14</sub> Receptor Activation. *Molecular*  
871 *Pharmacology*, 151-160.
- 872 Lee, B.-C., Cheng, T., Adams, G. B., Attar, E. C., Miura, N., Bong Lee, S., . . . Scadden, D. T.  
873 (2003). P2Y-like receptor, GPR105 (P2Y<sub>14</sub>), identifies and mediates chemotaxis of  
874 bone-marrow hematopoietic stem cells. *Genes and Development*, 1592-1604.
- 875 Li, H., Chang, L.-J., Neubauer, D. R., Muir, D. F., & Wallace, M. R. (2016). Immortalization of  
876 human normal and NF1 neurofibroma Schwann cells. *Nature Laboratory Investigation*,  
877 1105–1115.
- 878 Liao, C.-P., Booker, R. C., Brosseau, J.-P., Chen, Z., Mo, J., Tchegnon, E., . . . Le, L. Q. (2018).  
879 Contributions of inflammation and tumor microenvironment to neurofibroma  
880 tumorigenesis. *Journal of Clinical Investigation*, 2848-2861.
- 881 Lin, J., Liu, F., Zhang, Y., Song, N., Liu, M., Fang, X., . . . Shen, J. (2019). P2Y<sub>14</sub> receptor is  
882 functionally expressed in satellite glial cells and mediates interleukin-1 $\beta$  and chemokine  
883 CCL2 secretion. *Journal of Cell Physiology*, 21199-21210.
- 884 Ling, B. C., Wu, J., Miller, S. J., Monk, K. R., Shamekh, R., Rizvi, T. A., . . . Ratner, N. (2005).  
885 Role for the epidermal growth factor receptor in neurofibromatosis-related peripheral  
886 nerve tumorigenesis. *Cancer Cell*, 65–75.
- 887 Müller, T., Bayer, H., Myrtek, D., Ferrari, D., Sorichter, S., Ziegenhagen, M. W., . . . Idzko, M.  
888 (2005). The P2Y<sub>14</sub> receptor of airway epithelial cells: coupling to intracellular Ca<sup>2+</sup> and  
889 IL-8 secretion. *American Journal of Respiratory Cell Molecular Biology*, 601-609.
- 890 MacKenzie, S. J., & Houslay, M. D. (2000). Action of rolipram on specific PDE4 cAMP  
891 phosphodiesterase isoforms and on the phosphorylation of cAMP-response-element-  
892 binding protein (CREB) and p38 mitogen-activated protein (MAP) kinase in U937  
893 monocytic cells. *Biochemistry Journal*, 571-578.
- 894 Malin, S. A., & Molliver, D. C. (2010). Gi- and Gq-coupled ADP (P2Y) receptors act in  
895 opposition to modulate nociceptive signaling and inflammatory pain behavior. *Molecular*  
896 *Pain*, 6-21.
- 897 Martin, G. A., Viskochil, D., Bollag, G., McCabe, P. C., Crosier, W. J., Haubruck, H., . . .  
898 Cawthon, R. M. (1990). The GAP-related domain of the neurofibromatosis type 1 gene  
899 product interacts with ras p21. *Cell Press*, 843-849.
- 900 Meister, J., Le Duc, D., Ricken, A., Burkhardt, R., Thiery, J., Pfannkuche, J., . . . Schulz, A.  
901 (2014). The G protein-coupled receptor P2Y<sub>14</sub> influences insulin release and smooth  
902 muscle function in mice. *Journal of Biological Chemistry*, 23353-23366.
- 903 Mirsky, R., Woodhoo, A., Parkinson, D. B., Arthur-Farraj, P., Bhaskaran, A., & Jessen, K.  
904 (2008). Novel signals controlling embryonic Schwann cell development, myelination and  
905 dedifferentiation. *Journal of the peripheral nervous system*, 122-135.

- 906 Moore , D., Murdock, P., Watson , J., Faull , R., Waldvogel , H., Szekeres , P., . . . Emson , P.  
907 (2003). GPR105, a novel Gi/o-coupled UDP-glucose receptor expressed on brain glia and  
908 peripheral immune cells, is regulated by immunologic challenge: possible role in  
909 neuroimmune function. *Molecular Brain Research*, 10-23.
- 910 Nguyen, R., Dombi, E., Widemann, B. C., Solomon, J., Fuensterer, C., Kluwe, L., . . . Mautner,  
911 V.-F. (2012). Growth dynamics of plexiform neurofibromas: a retrospective cohort study  
912 of 201 patients with neurofibromatosis 1. *Orphanet Journal of Rare Diseases*, 7-75.
- 913 Patritti-Cram, J., Coover , R. A., Jankowski , M. P., & Ratner, N. (2021). Purinergic signaling in  
914 peripheral nervous system glial cells. *Glia*, Epub ahead of print.
- 915 Prudner , B. C., Ball, T., Rathore , R., & Hirbe, A. C. (2020). Diagnosis and management of  
916 malignant peripheral nerve sheath tumors: Current practice and future perspectives.  
917 *Neurooncology Advances*, 40-49.
- 918 Robichaud, J., Fournier, J. F., Gagné, S., Gauthier, J. Y., Hamel, M., Han, Y., . . . Mamane, Y.  
919 (2011). Applying the pro-drug approach to afford highly bioavailable antagonists of  
920 P2Y14. *Bioorganics and Medicinal Chemistry Letters*, 4366-4368.
- 921 Scrivens, M., & Dickenson , J. M. (2006). Functional expression of the P2Y14 receptor in human  
922 neutrophils. *European Journal of Pharmacology*, 166-173.
- 923 Scrivens, M., & Dickenson, J. (2005). Pharmacological effects mediated by UDP-glucose that  
924 are independent of P2Y14 receptor expression. *Pharmacological Research*, 533-538.
- 925 Scrivens, M., & Dickenson, J. M. (2005). Functional expression of the P2Y14 receptor in murine  
926 T-lymphocytes. *British Journal of Pharmacology*, 435-444.
- 927 Serra , E., Puig , S., Otero , D., Gaona, A., Kruyer H, Ars , E., . . . Lazaro, C. (1997).  
928 Confirmation of a double hit model for the Nf1 gene in benign neurofibromas. *American*  
929 *Journal of Human Genetics*, 512-519.
- 930 Serra, E., Ravella, A., Sánchez, A., Puig, S., Rosenbaum, T., Estivill, X., & Lázaro, C. (2001).  
931 Somatic NF1 mutational spectrum in benign neurofibromas: mRNA splice defects are  
932 common among point mutations. *Human Genetics*, 416-429.
- 933 Sheela, S., Riccardi, V., & Ratner, N. (1990). Angiogenic and invasive properties of  
934 neurofibroma Schwann cells. *Journal of Cell Biology*, 645-653.
- 935 Sherman, L. S., Atit, R., Rosenbaum, T., Cox, A. D., & Ratner, N. (2000). Single Cell Ras-GTP  
936 Analysis Reveals Altered Ras Activity in a Subpopulation of Neurofibroma Schwann  
937 Cells but Not Fibroblasts. *Journal of Biological Chemistry*, 30740-30745.
- 938 Simanshu, D. K., Nissley, D. V., & McCormick , F. (2017). RAS Proteins and Their Regulators  
939 in Human Disease. *Cell* , 17-33.
- 940 Skelton, L., Cooper, M., Murphy, M., & Platt, A. (2003). Human immature monocyte-derived  
941 dendritic cells express the G protein-coupled receptor GPR105 (KIAA0001, P2Y14) and  
942 increase intracellular calcium in response to its agonist, uridine diphosphoglucose.  
943 *Journal of Immunology*, 1941-1949.
- 944 Stierli, S., Napoli, I., White, I. J., Cattin, A.-L., Monteza Cabrejos, A., Garcia Calavia, N., . . .  
945 Lloyd, A. (2018). The regulation of the homeostasis and regeneration of peripheral nerve  
946 is distinct from the CNS and independent of a stem cell population. *Development*, 1-12.
- 947 Tabata, M. M., Li, S., Knight, P., Bakker, A., & Sarin, K. Y. (2020). Phenotypic heterogeneity of  
948 neurofibromatosis type 1 in a large international registry. *Journal of Clinical*  
949 *Investigation*, e136262.
- 950 Tong, J., Hannan, F., Zhu, Y., Bernards, A., & Zhong, Y. (2002). Neurofibromin regulates G  
951 protein-stimulated adenylyl cyclase activity. *Nature Neuroscience*, 95-96.

- 952 Vincent, E. E., Elder, D. J., Thomas, E. C., Phillips, L., Morgan, C., Pawade, J., . . . Tavaré, J. M.  
953 (2011). Akt phosphorylation on Thr308 but not on Ser473 correlates with Akt protein  
954 kinase activity in human non-small cell lung cancer. *British Journal of Cancer*, 1755–  
955 1761.
- 956 Walker, J. A., & Bernardis, A. (2014). A Drosophila screen identifies neurofibromatosis-1  
957 genetic modifiers involved in systemic and synaptic growth. *Rare Diseases*, e28341.
- 958 Warrington, N. M., Gianino, S. M., Jackson, E., Goldhoff, P., Garbow, J. R., Piwnica-Worms,  
959 D., . . . Rubin, J. B. (2010). Cyclic AMP suppression is sufficient to induce gliomagenesis  
960 in a mouse model of Neurofibromatosis-1. *Cancer Research*, 5717-5727.
- 961 Williams, J., Wu, J., Johansson, G., Rizvi, T., Miller, S., Geiger, H., & Ratner, N. (2008). Nf1  
962 Mutation Expands an EGFR-Dependent Peripheral Nerve Progenitor that Confers  
963 Neurofibroma Tumorigenic Potential. *Cell Stem Cell*, 658-669.
- 964 Wolman, M. A., de Groh, E. D., McBride, S. M., Jongens, T. A., Granato, M., & Epstein, J. A.  
965 (2014). Modulation of cAMP and Ras signaling pathways improves distinct behavioral  
966 deficits in a zebrafish model of neurofibromatosis type 1. *Cell Reports*, 1265-1270.
- 967 Wu, J., Keng, V. W., Patmore, D. M., Kendall, J. J., Patel, A. V., Jousma, E., . . . Kim. (2016).  
968 Insertional Mutagenesis Identifies a STAT3/Arid1b/β-catenin Pathway Driving  
969 Neurofibroma Initiation. *Cell Rep*, 1979-90.
- 970 Wu, J., Williams, J., Rizvi, T., Kordich, J., Witte, D., Meijer, D., . . . Ratner, N. (2008).  
971 Plexiform and Dermal Neurofibromas and Pigmentation Are Caused by Nf1 Loss in  
972 Desert Hedgehog-Expressing Cells. *Cancer Cell*, 105-116.
- 973 Xu, G. F., O'Connell, P., Viskochil, D., Cawthon, R., Robertson, M., Culver, M., . . . White, R.  
974 (1990). The neurofibromatosis type 1 gene encodes a protein related to GAP. *Cell Press*,  
975 599-608.
- 976 Xu, J., Morinaga, H., Oh, D., Li, P., Chen, A., Talukdar, S., . . . Kim, J. J. (2012). GPR105  
977 ablation prevents inflammation and improves insulin sensitivity in mice with diet-induced  
978 obesity. *Journal of Immunology*, 1992-1999.
- 979 Zheng, H., Chang, L., Patel, N., Yang, J., Lowe, L., Burns, D. K., & Zhu, Y. (2008). Induction of  
980 abnormal proliferation by nonmyelinating schwann cells triggers neurofibroma  
981 formation. *Cancer Cell*, 117-128.
- 982 Zhu, Y., Ghosh, P., Charnay, P., Burns, D. K., & Parada, L. F. (2002). Neurofibromas in NF1:  
983 Schwann cell origin and role of tumor environment. *Science*, 920-922.  
984



Figure 1

**A** human plexiform neurofibroma:

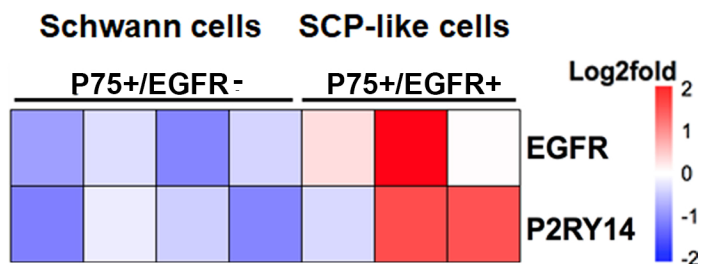

**B** human    neurofibroma

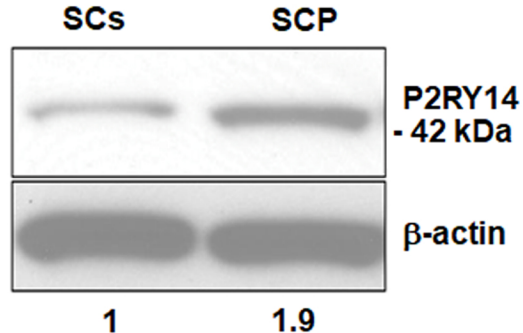

**C**

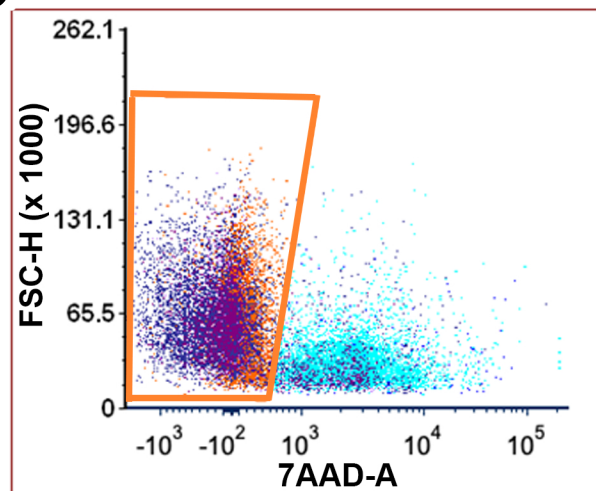

**D**

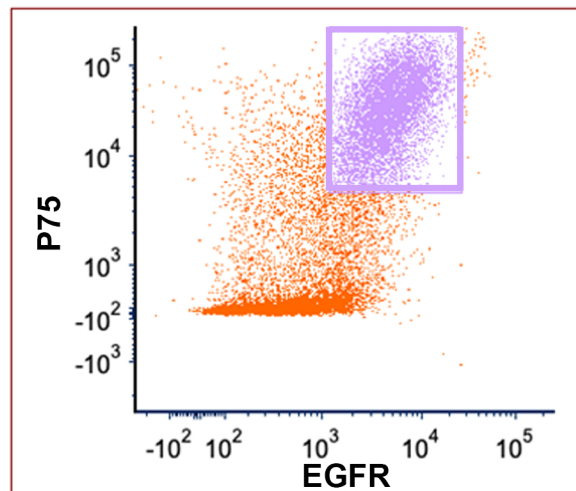

**E**

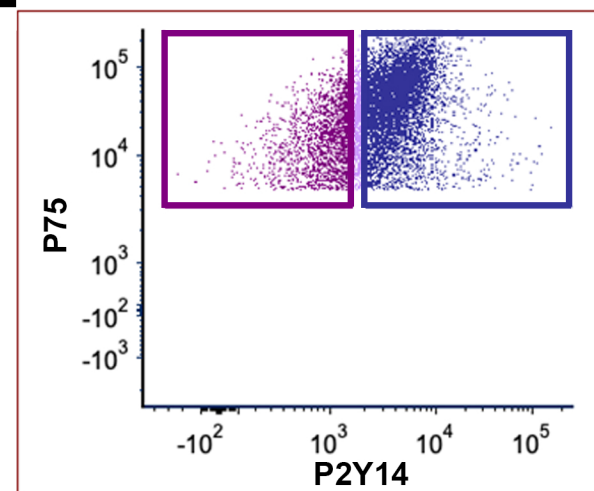

**F**

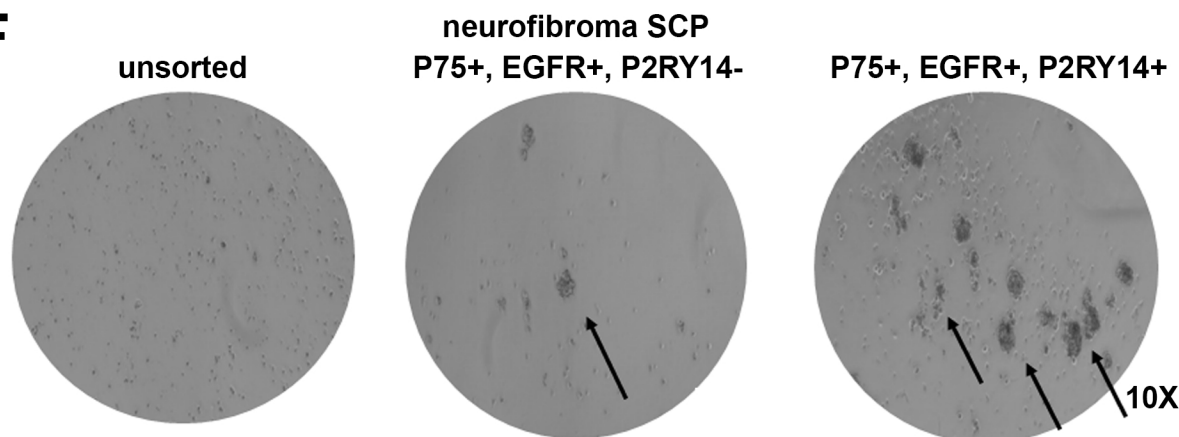

**G**

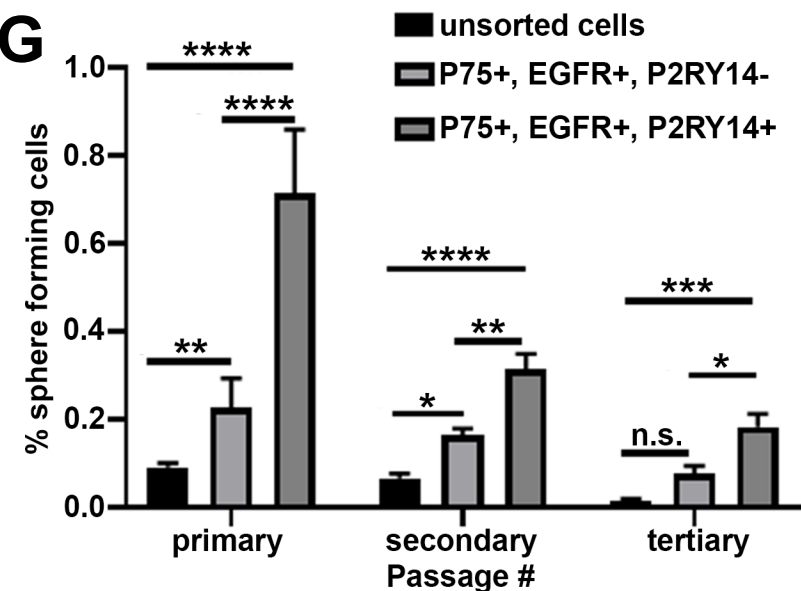

**A**

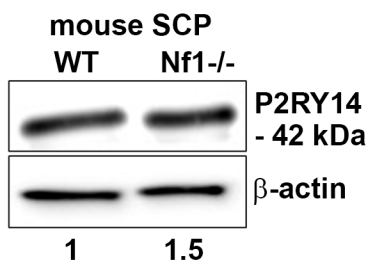

**B**

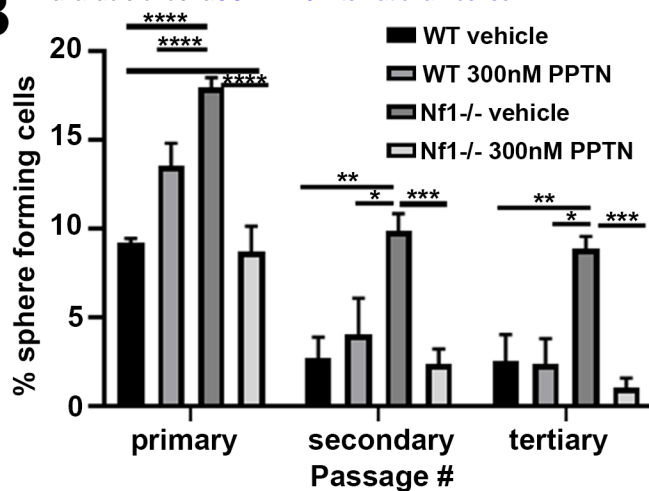

**C**

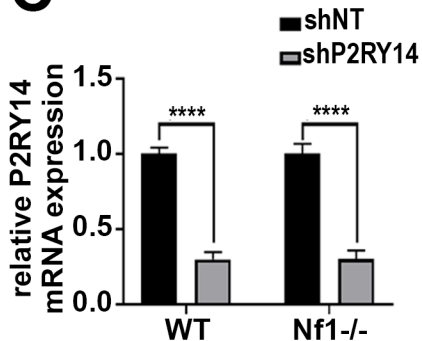

**D**

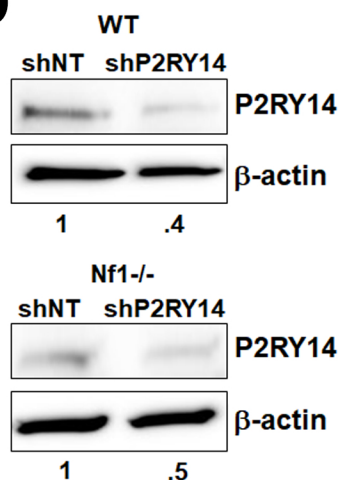

**E**

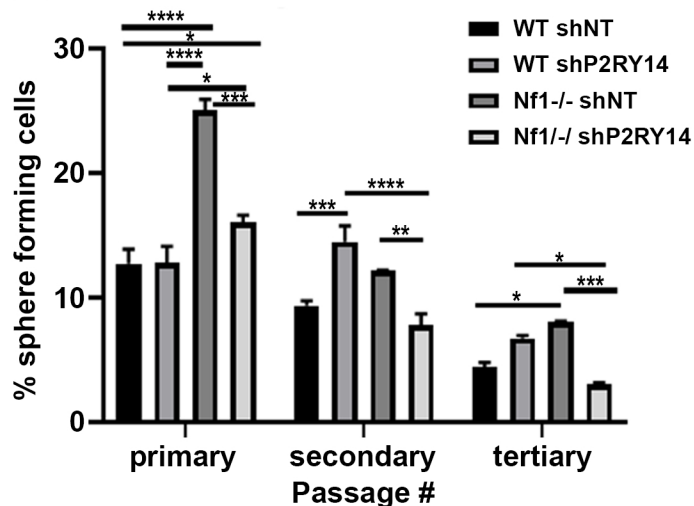

**F**

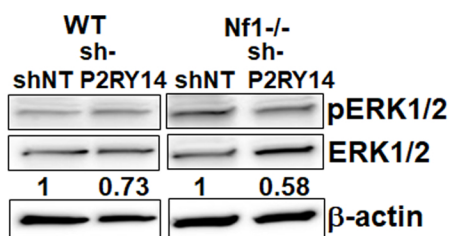

**G**

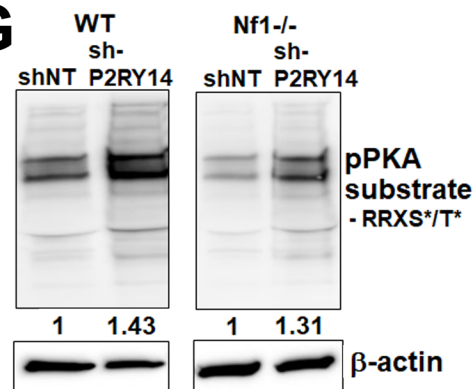

**H**

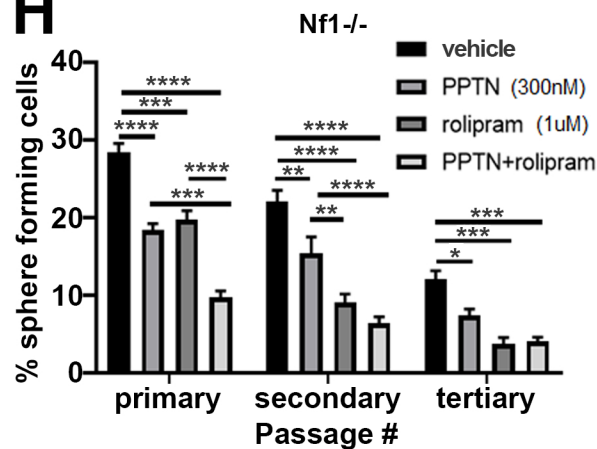

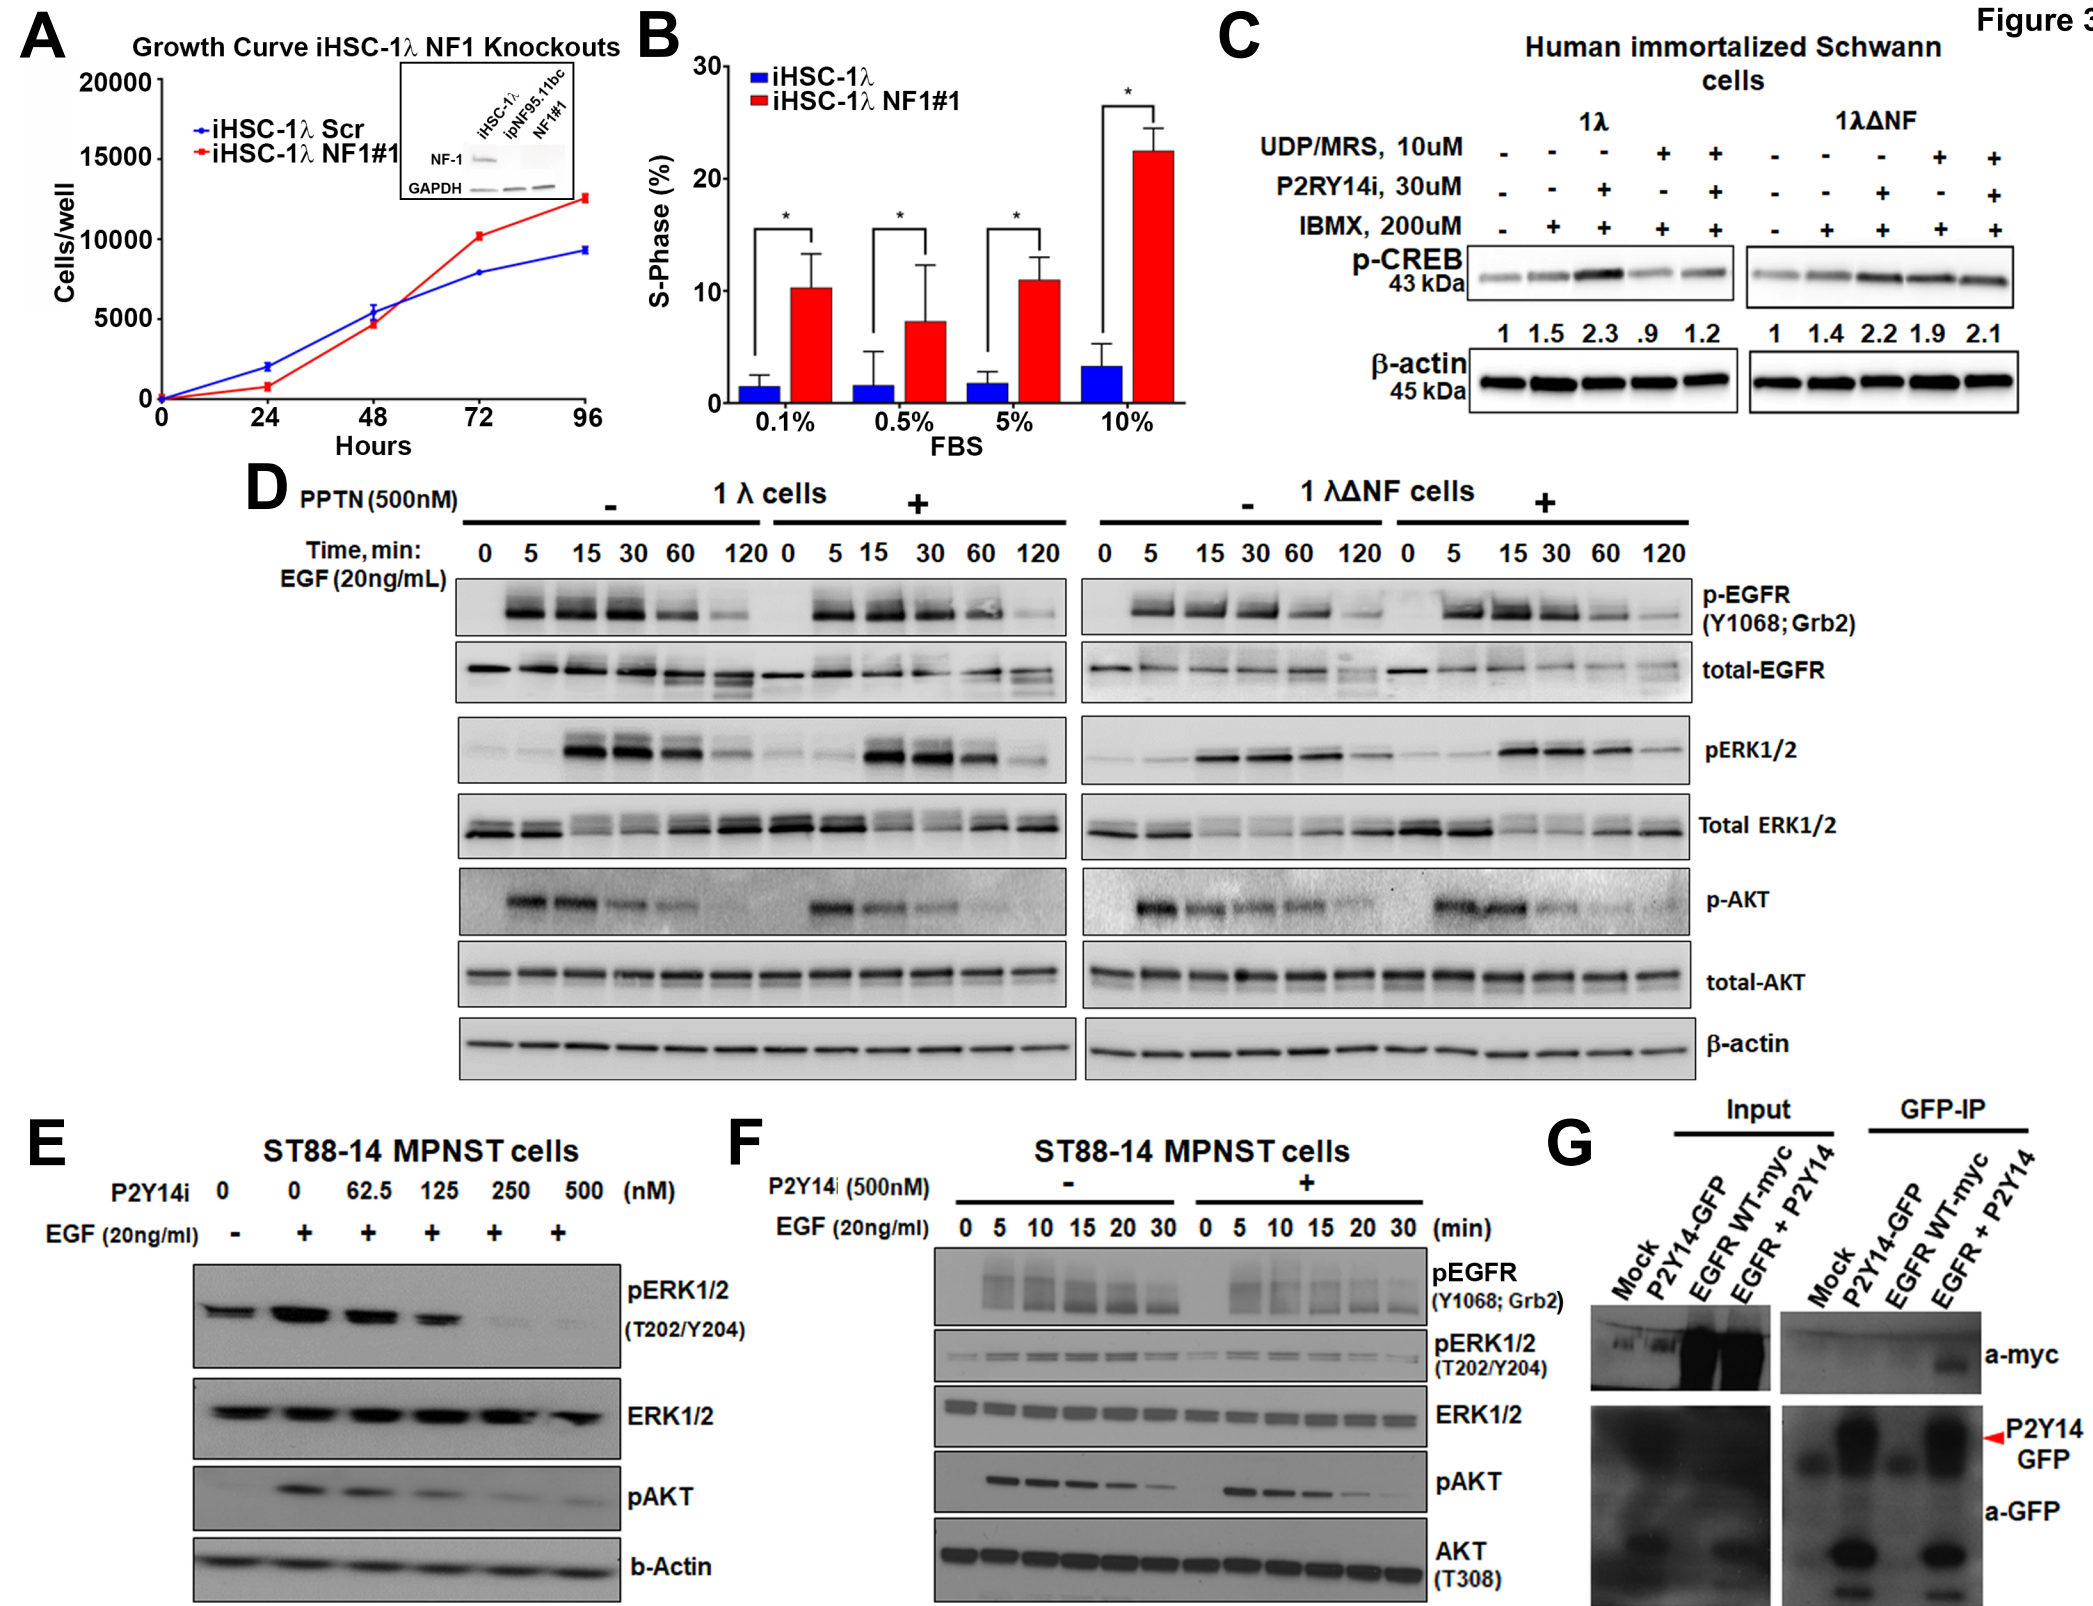

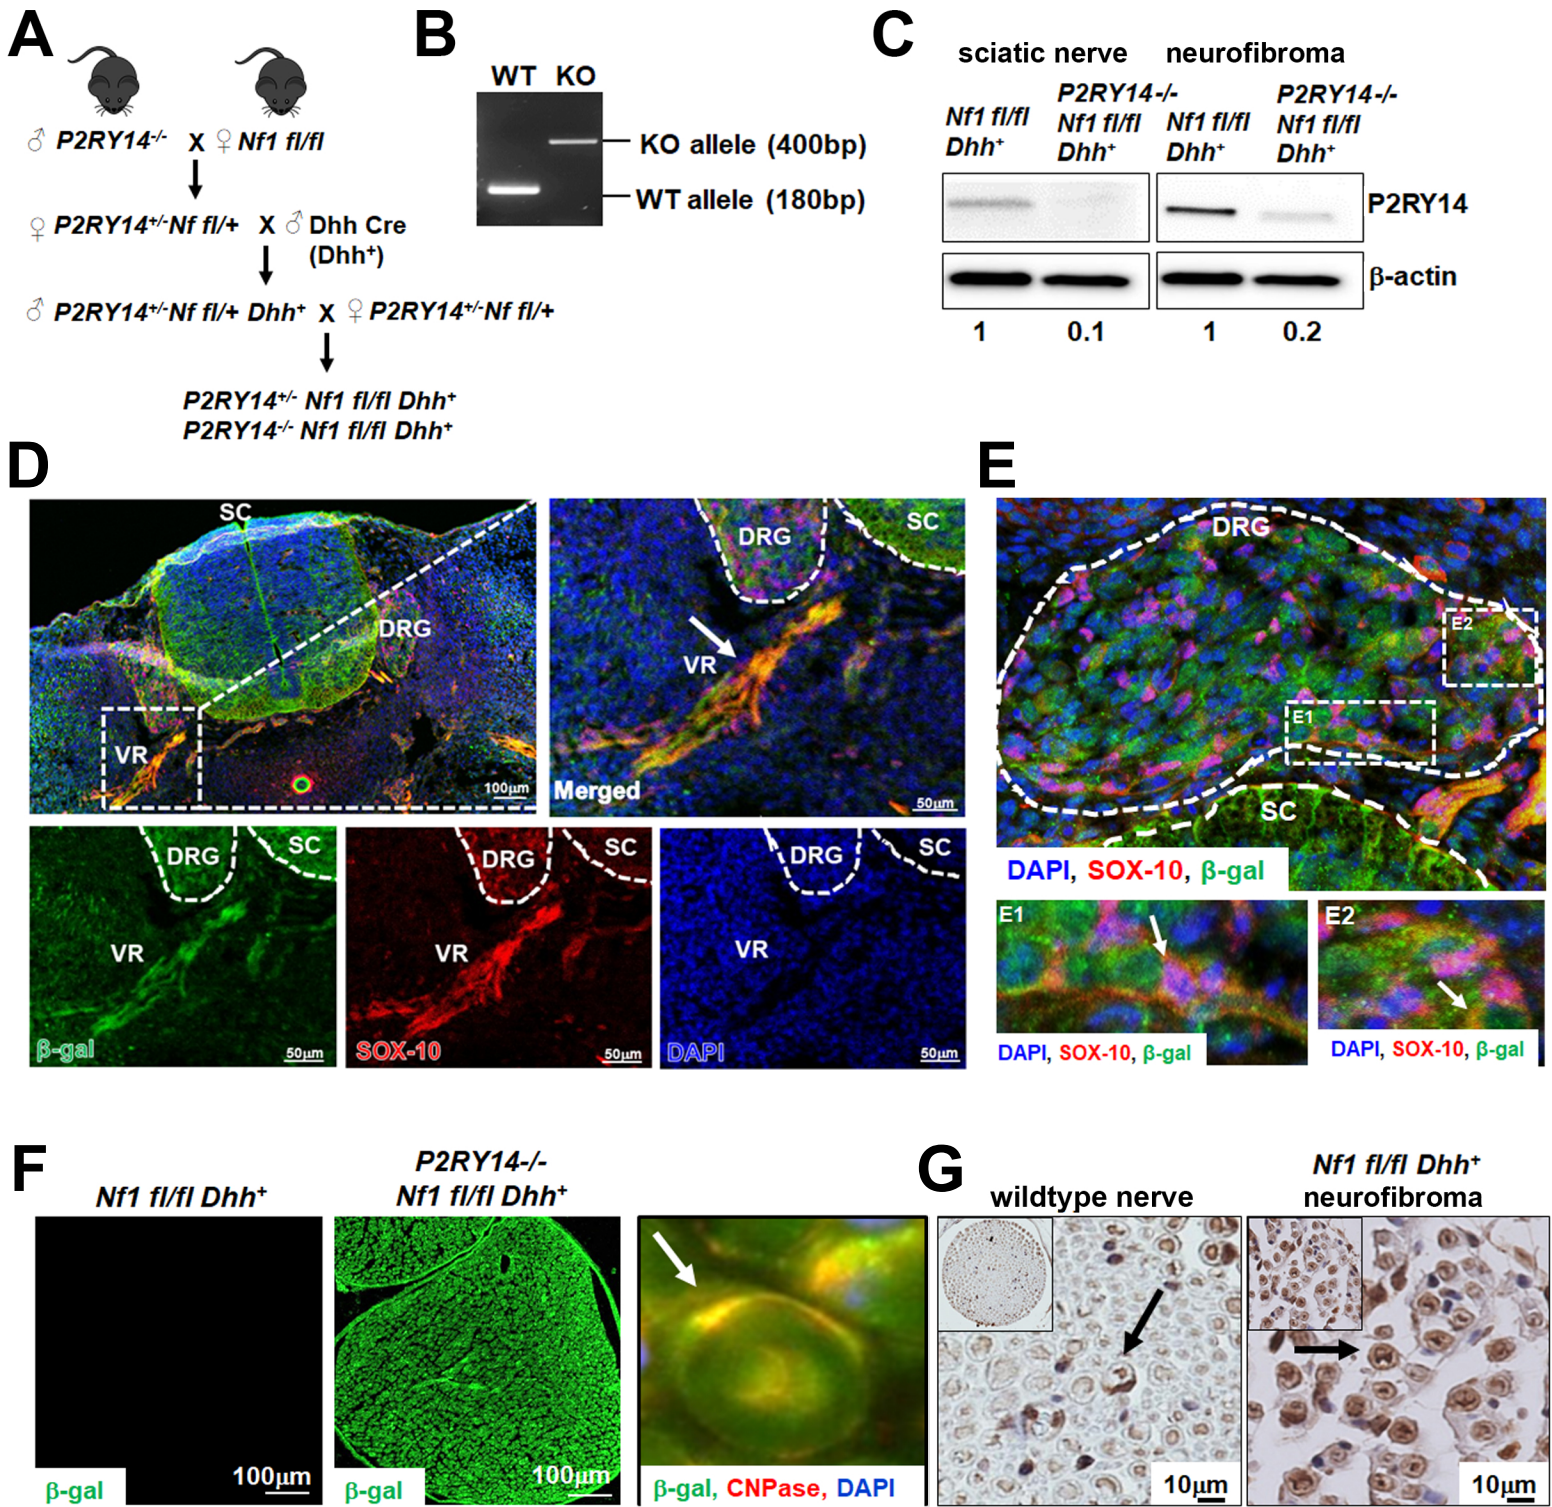

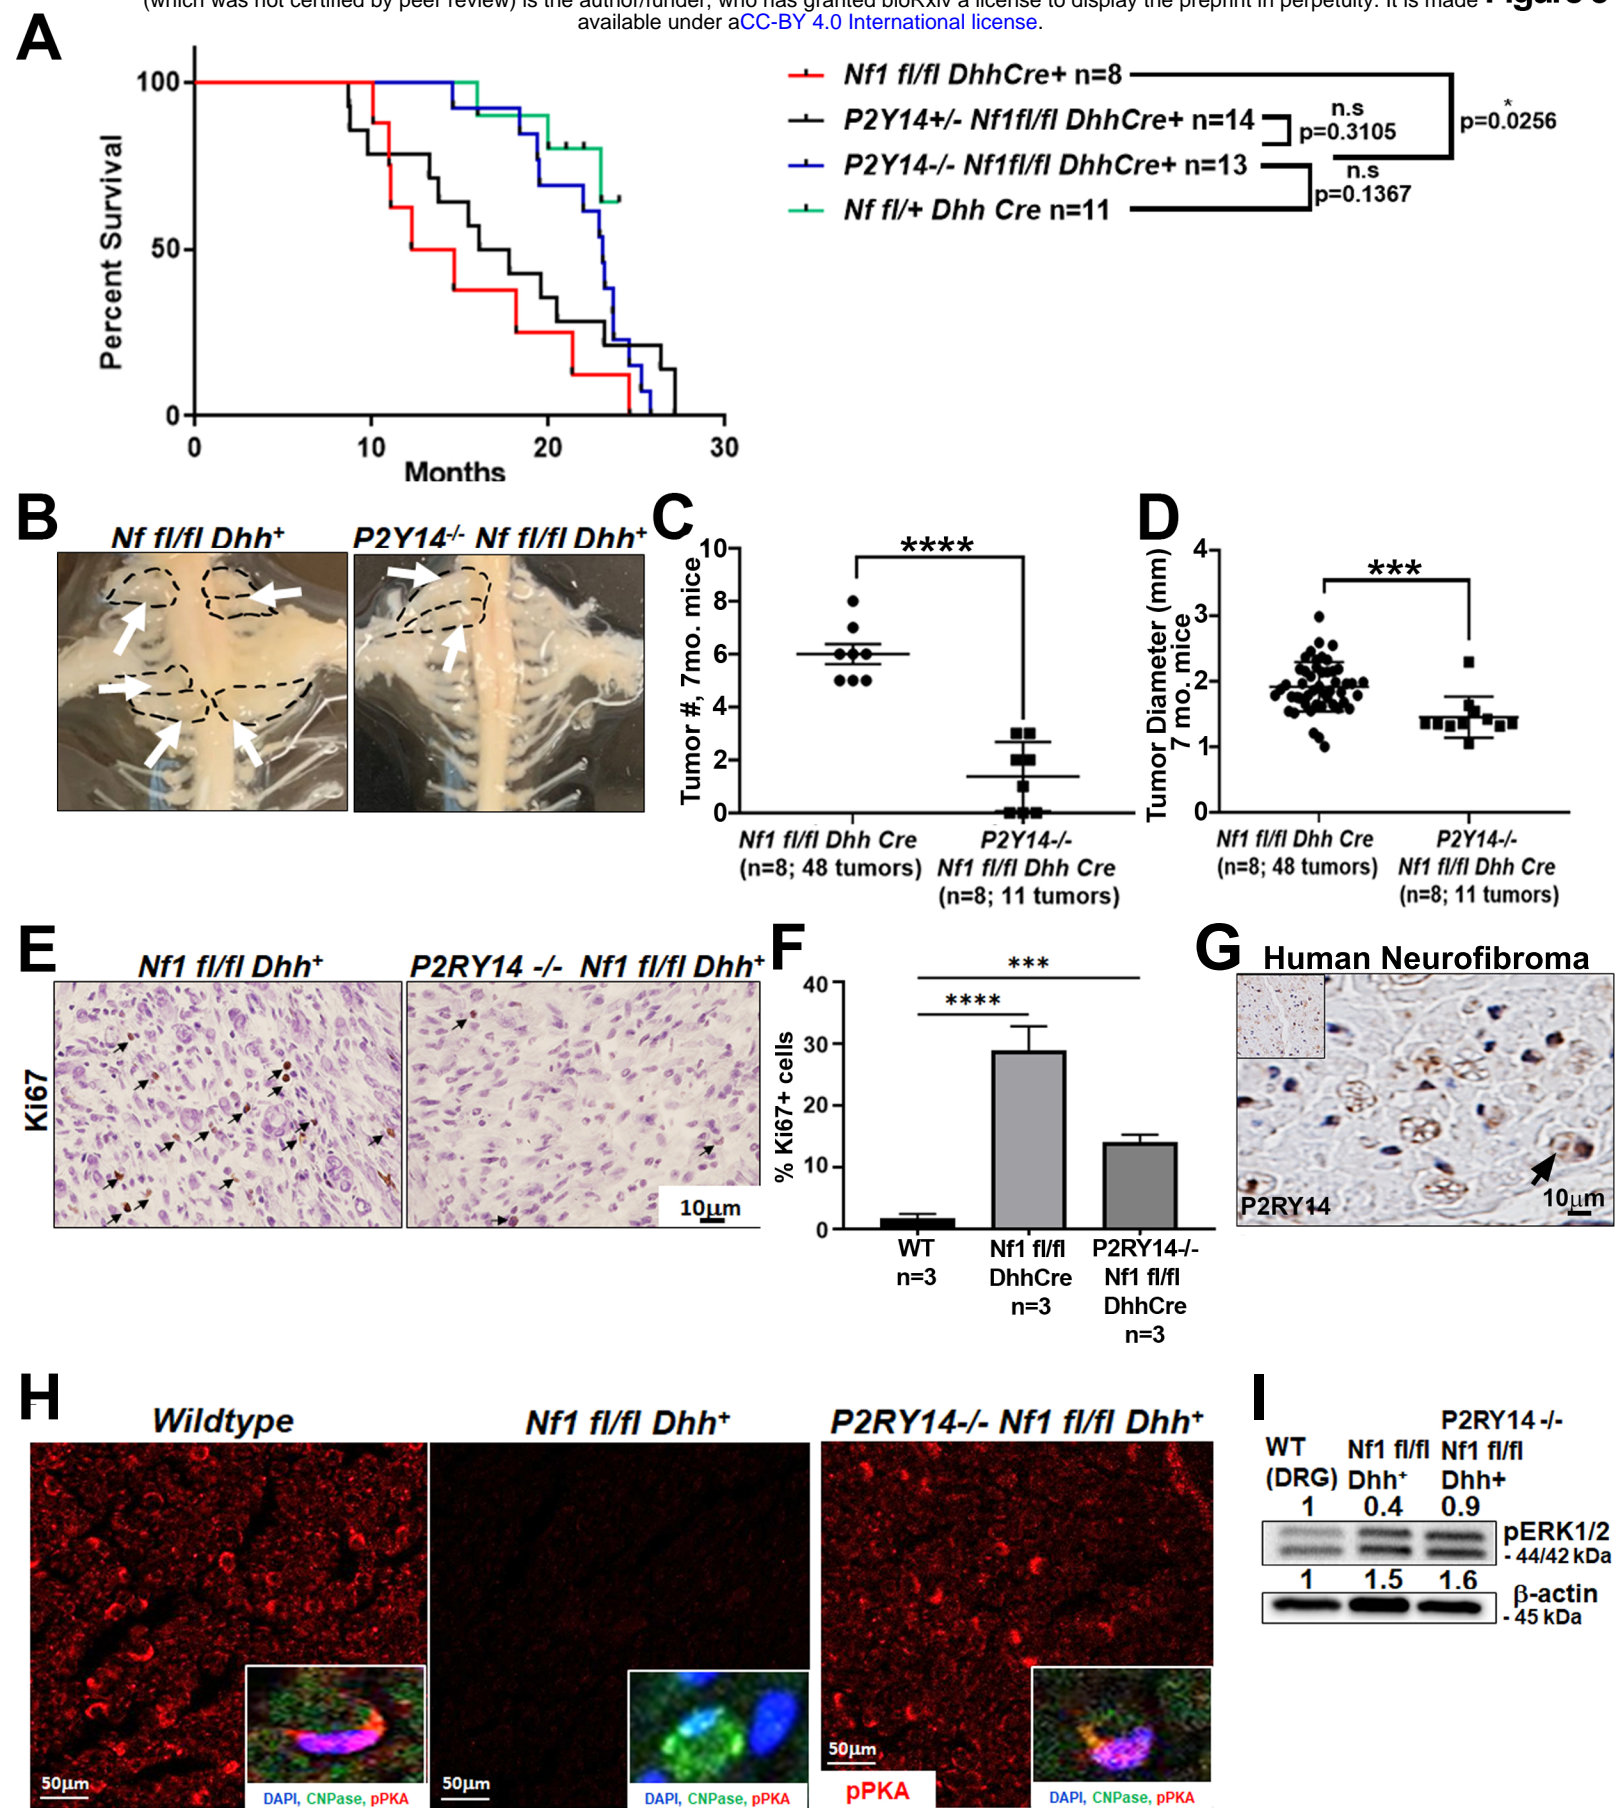

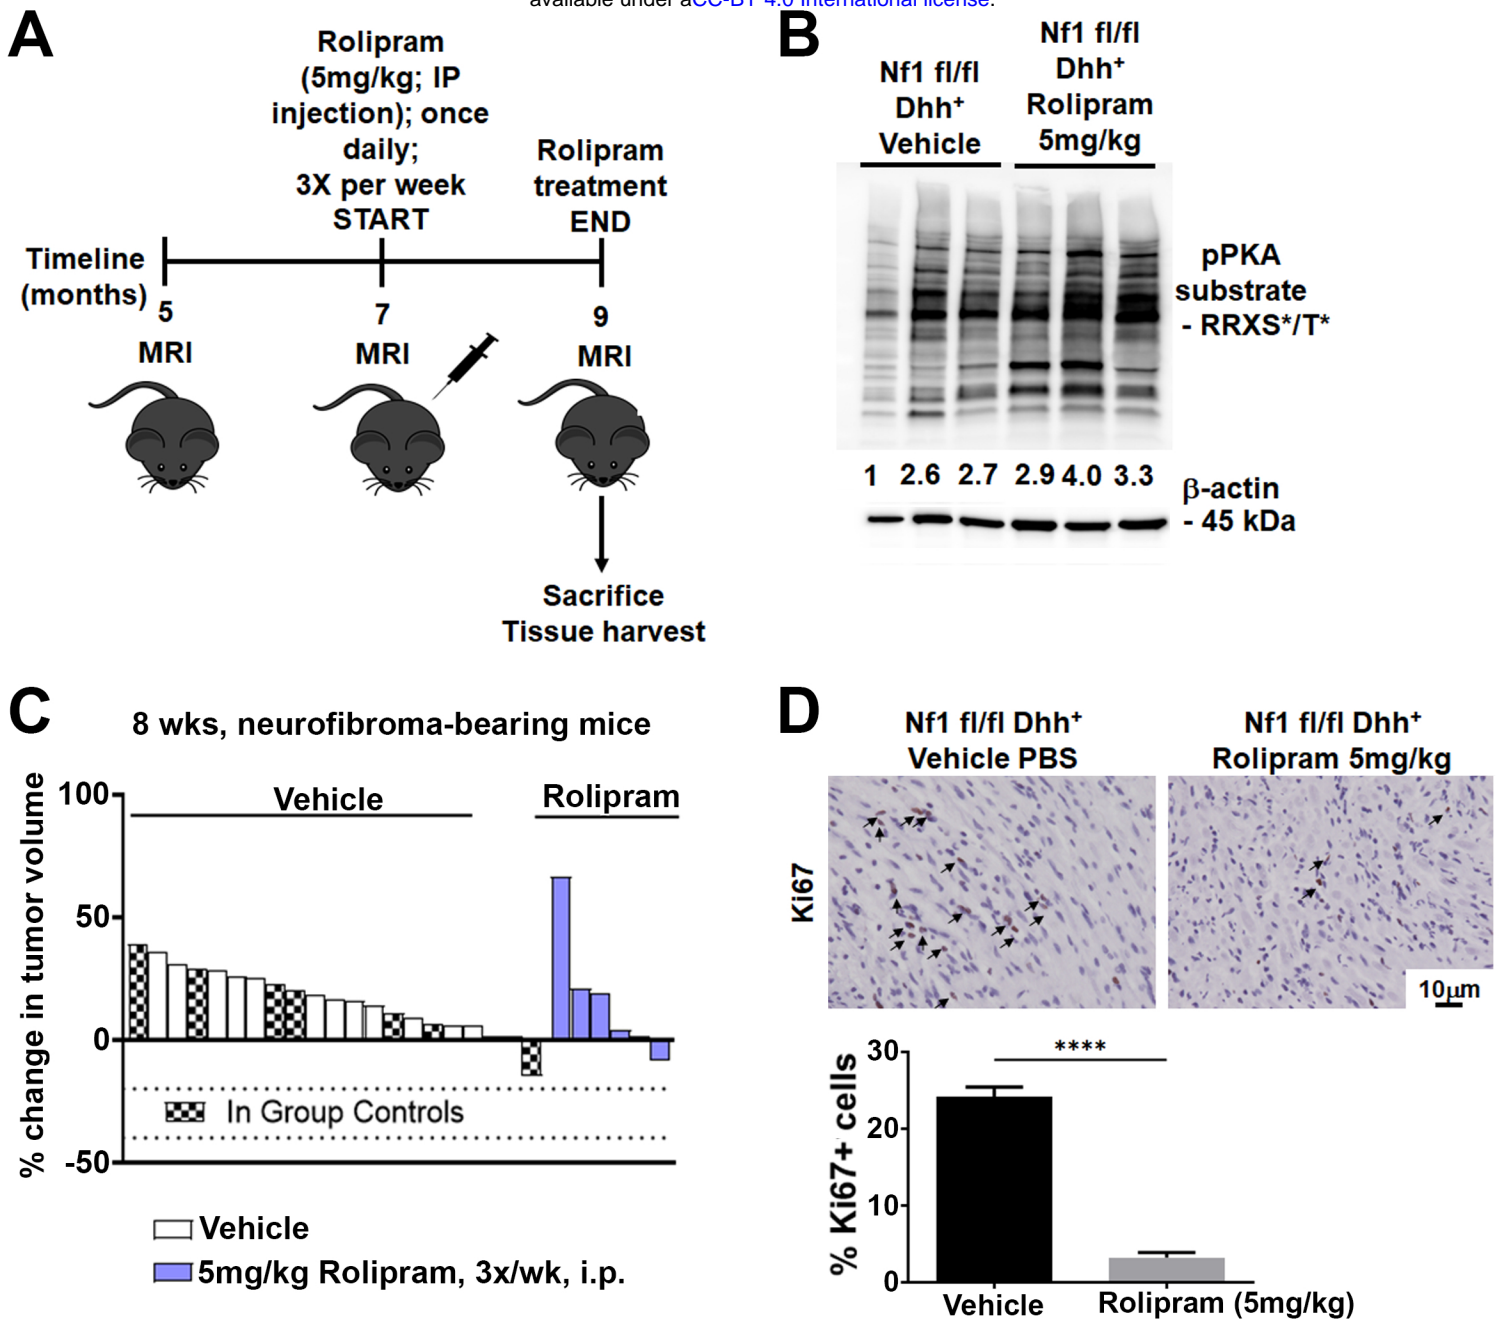

**Figure S1**

**A**

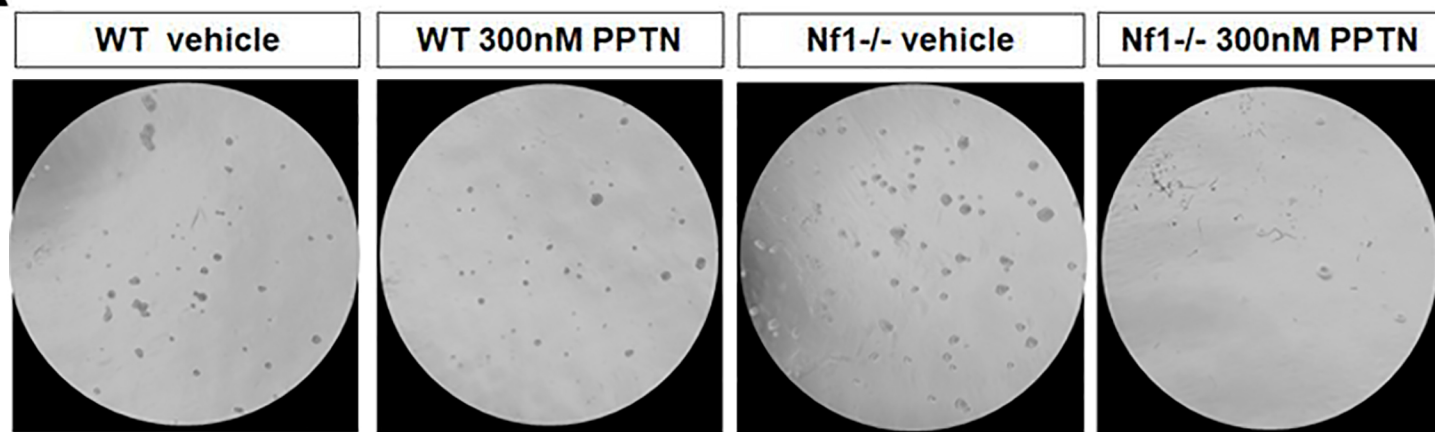

**B**

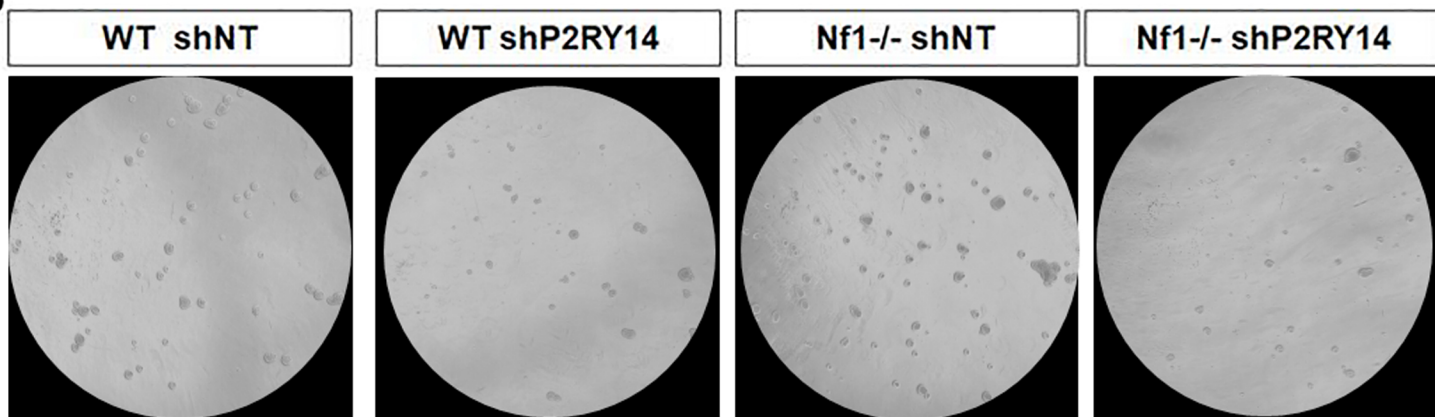

**C**

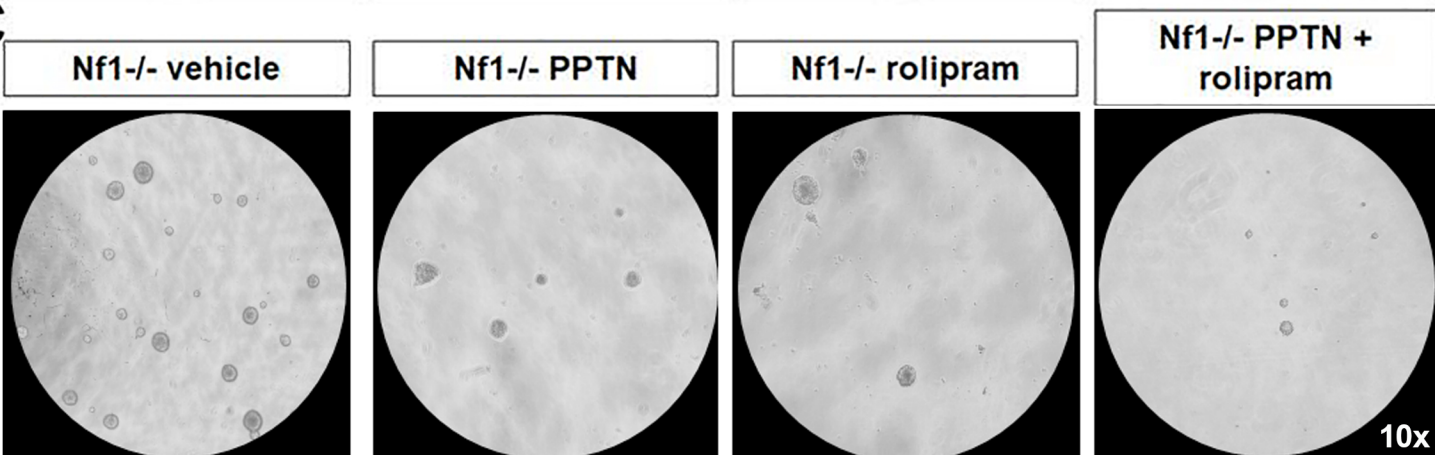

# Figure S2

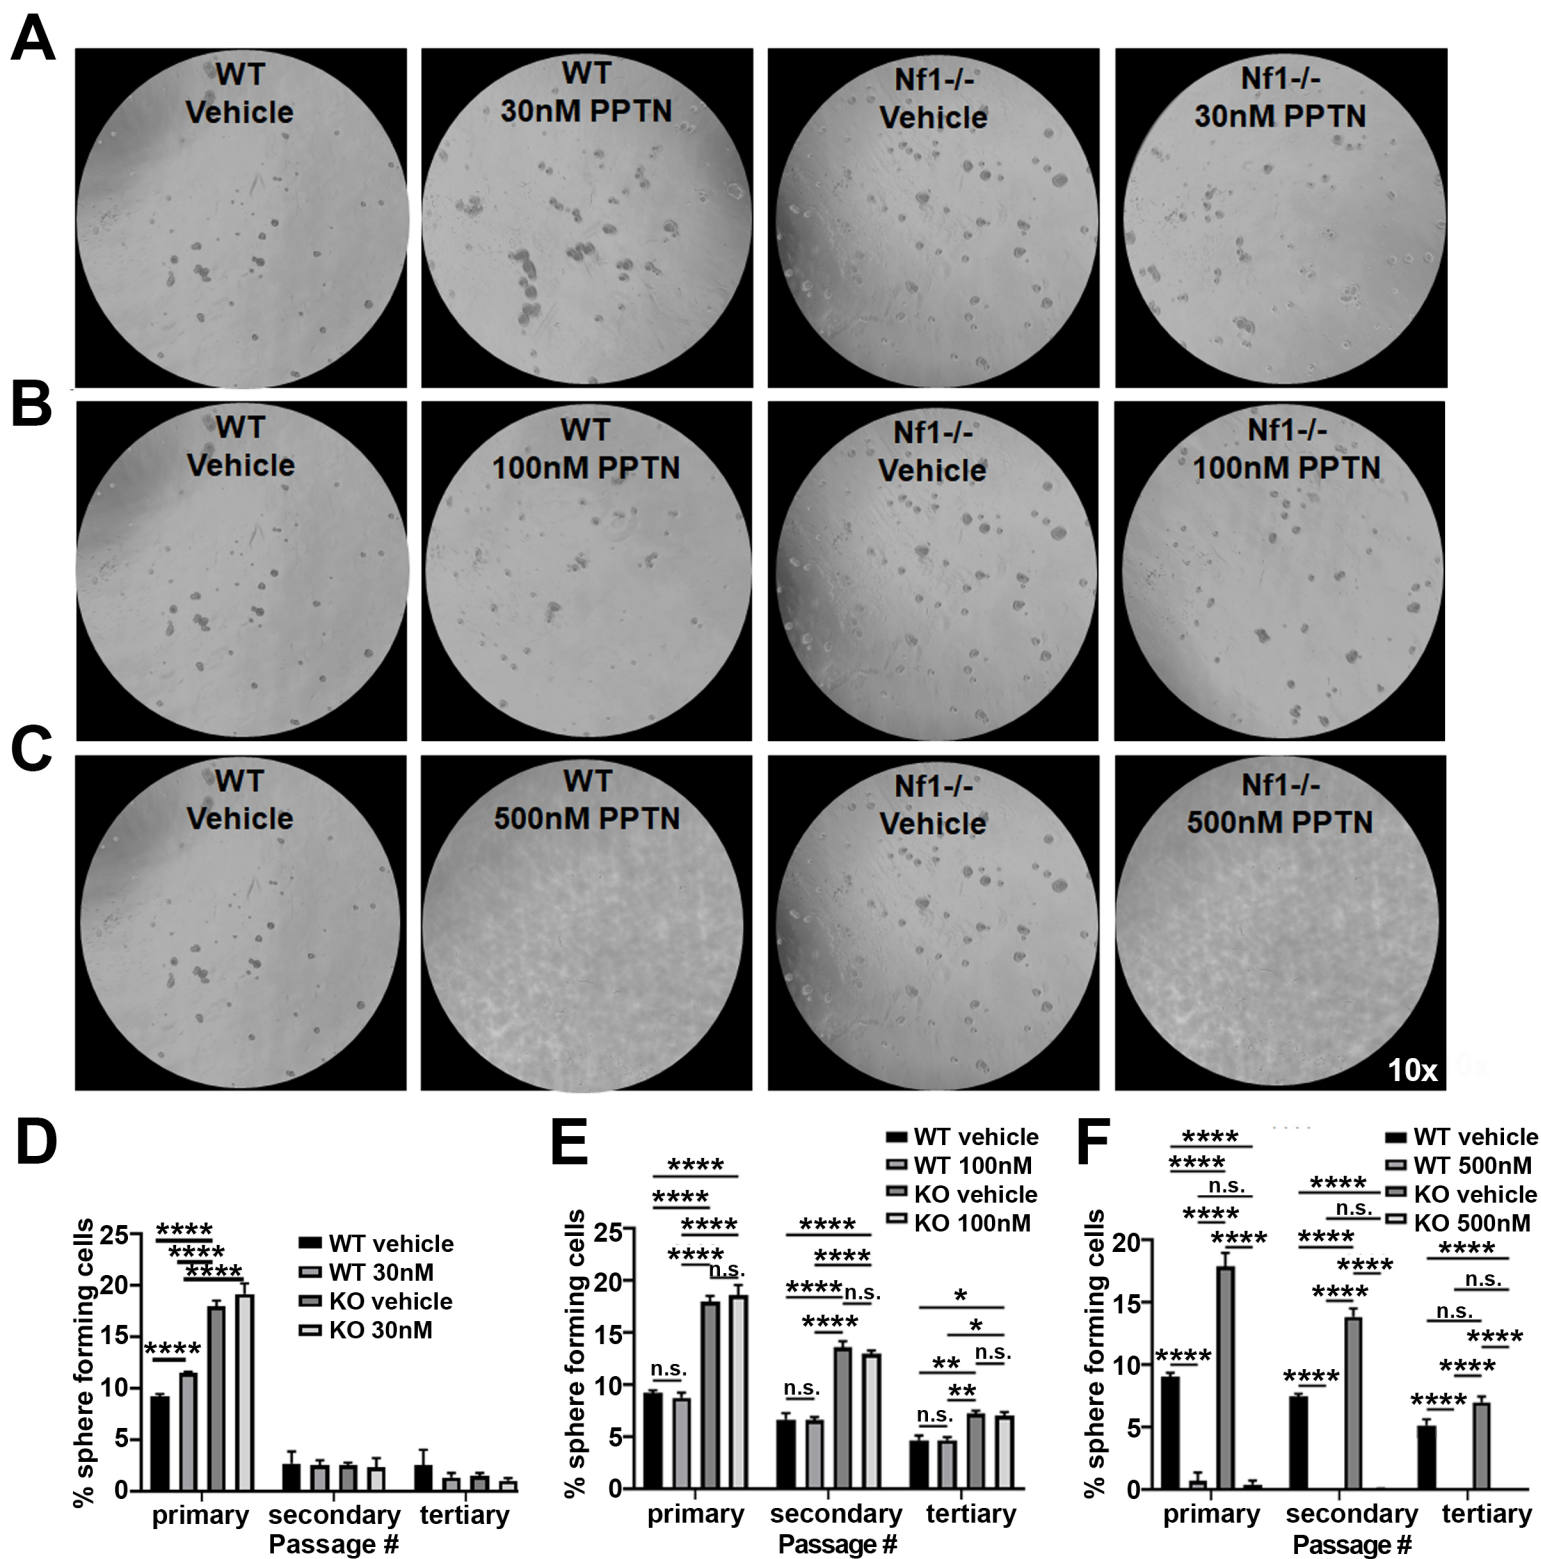



**A**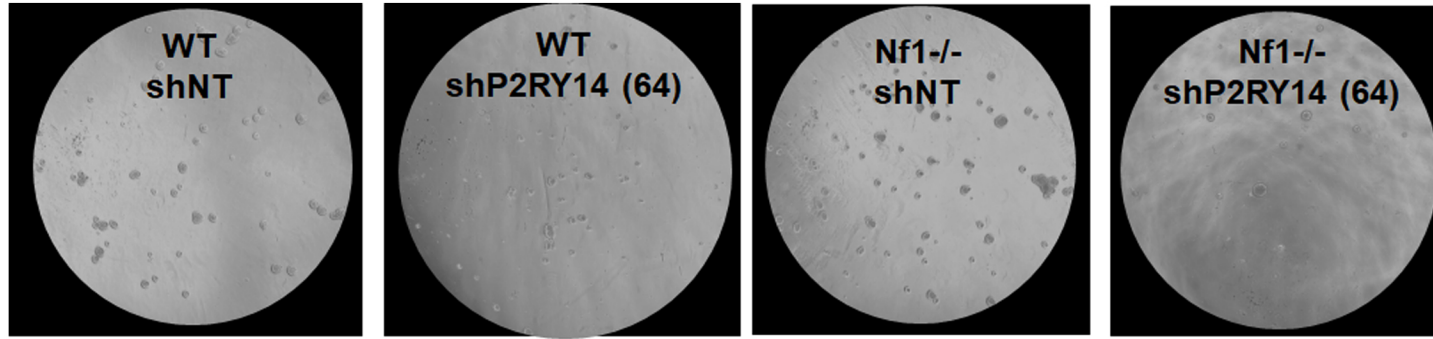**C**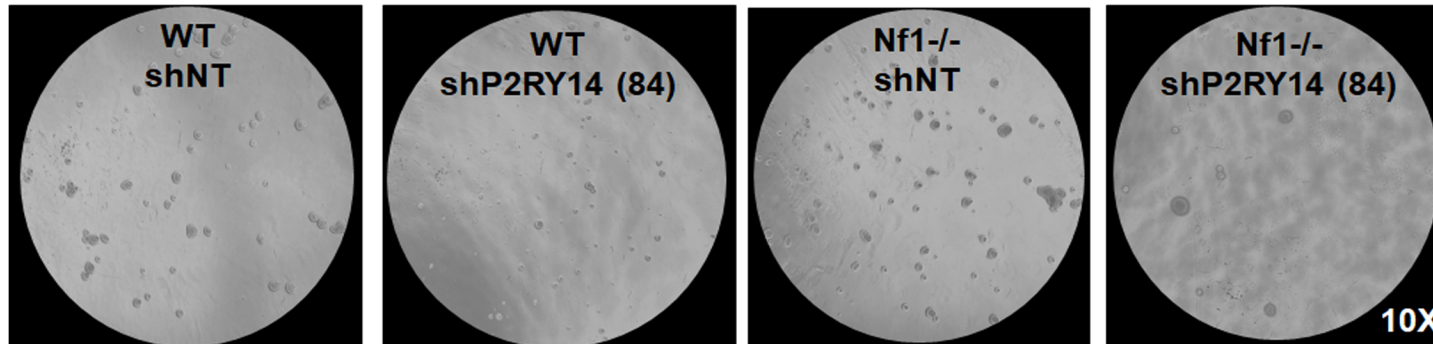**B**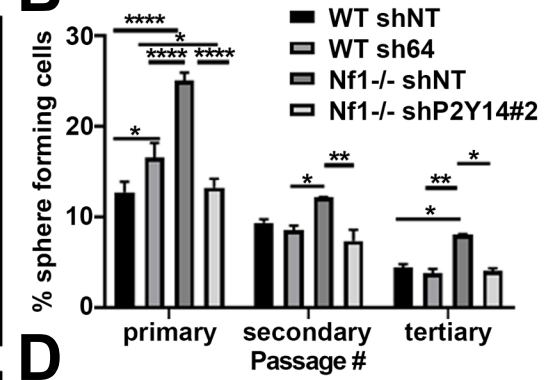**D**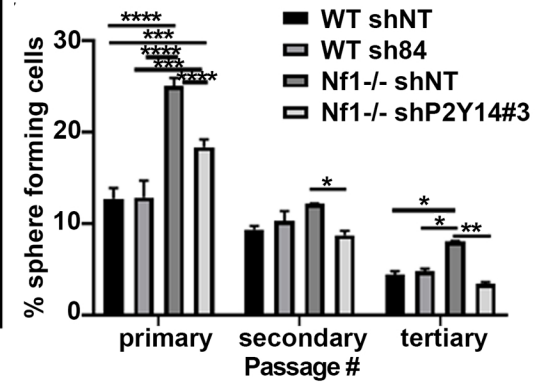**E**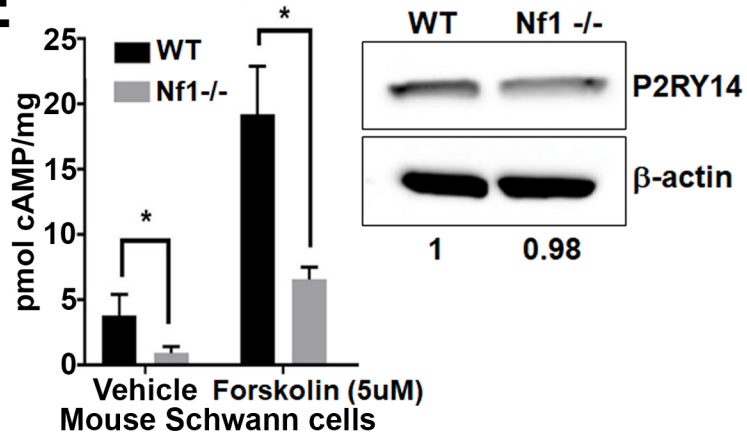

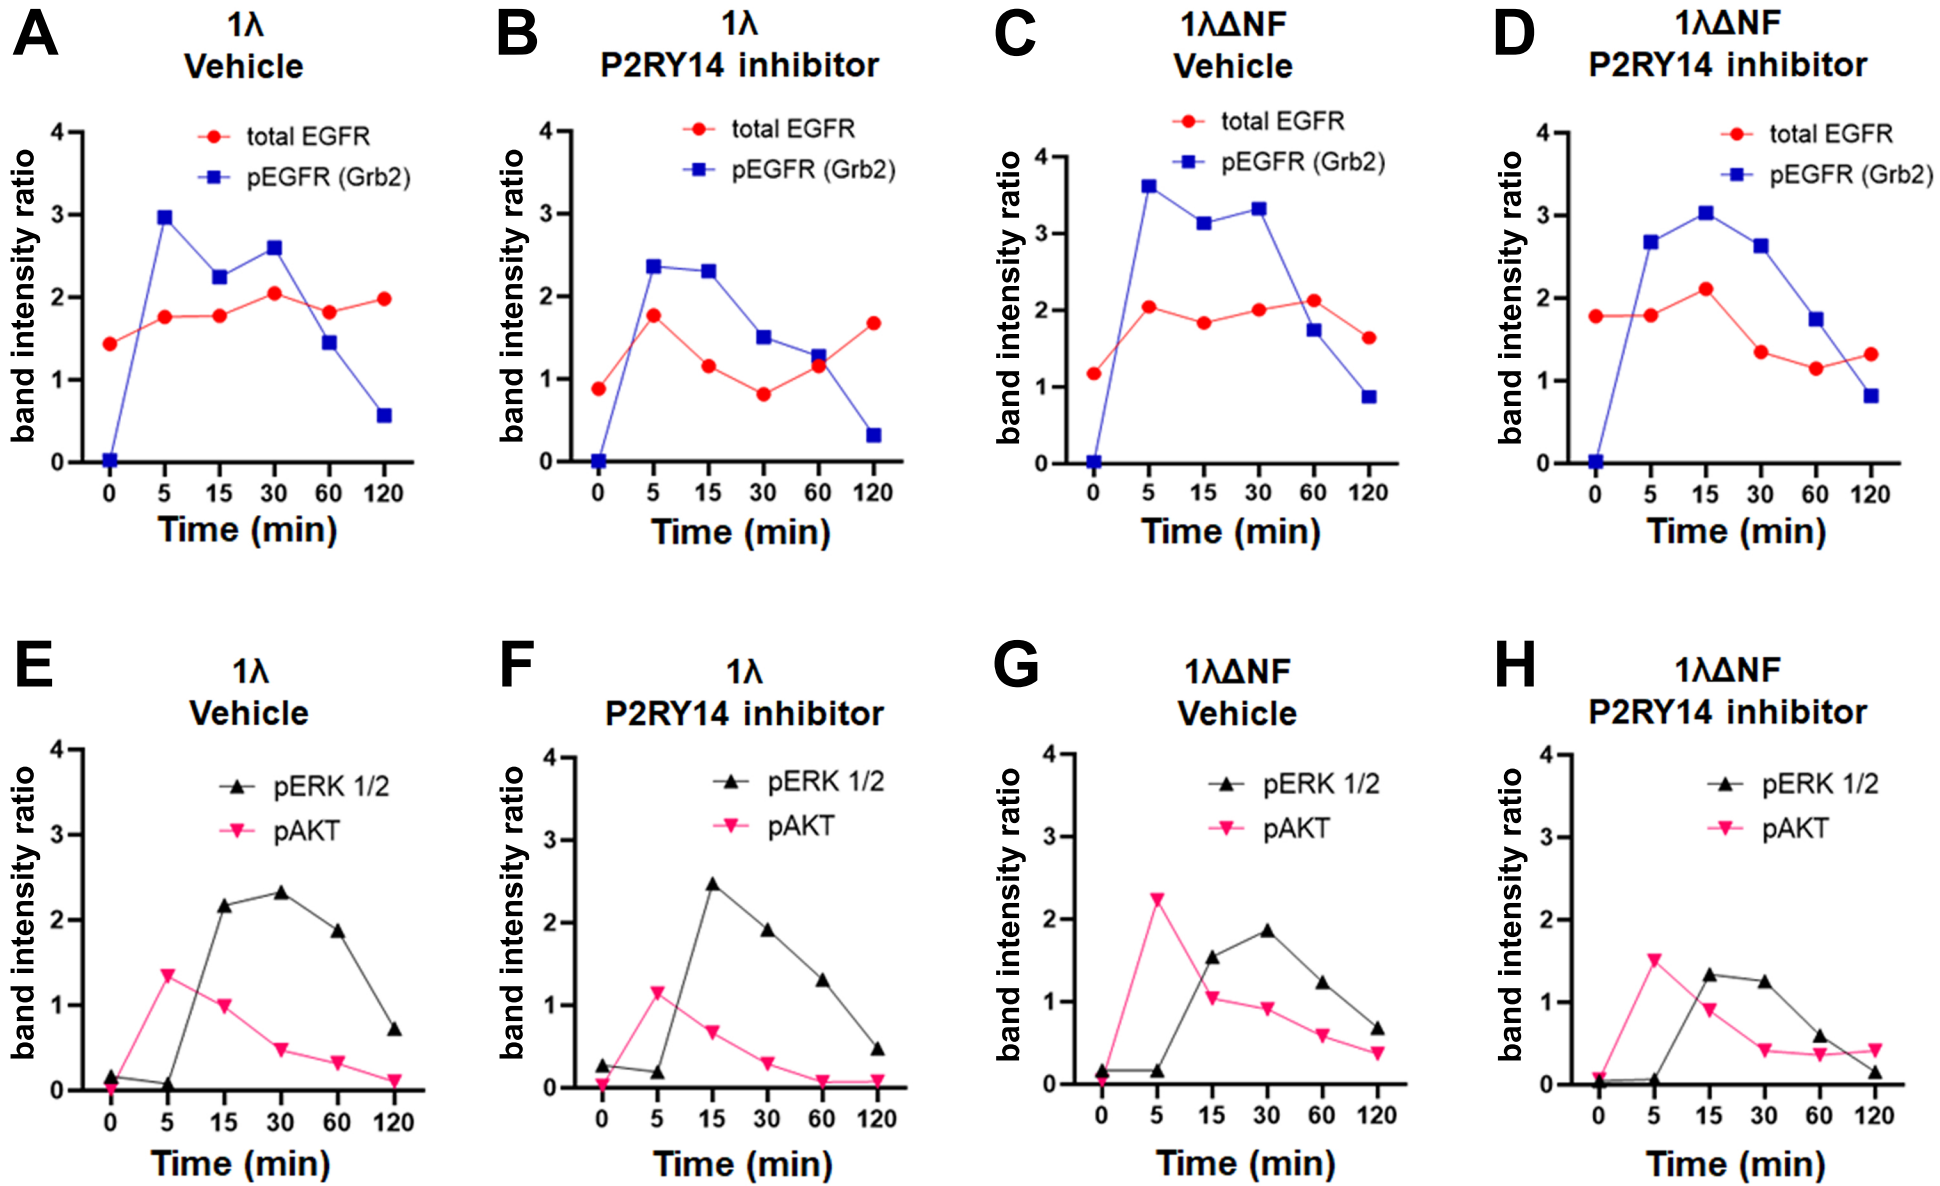

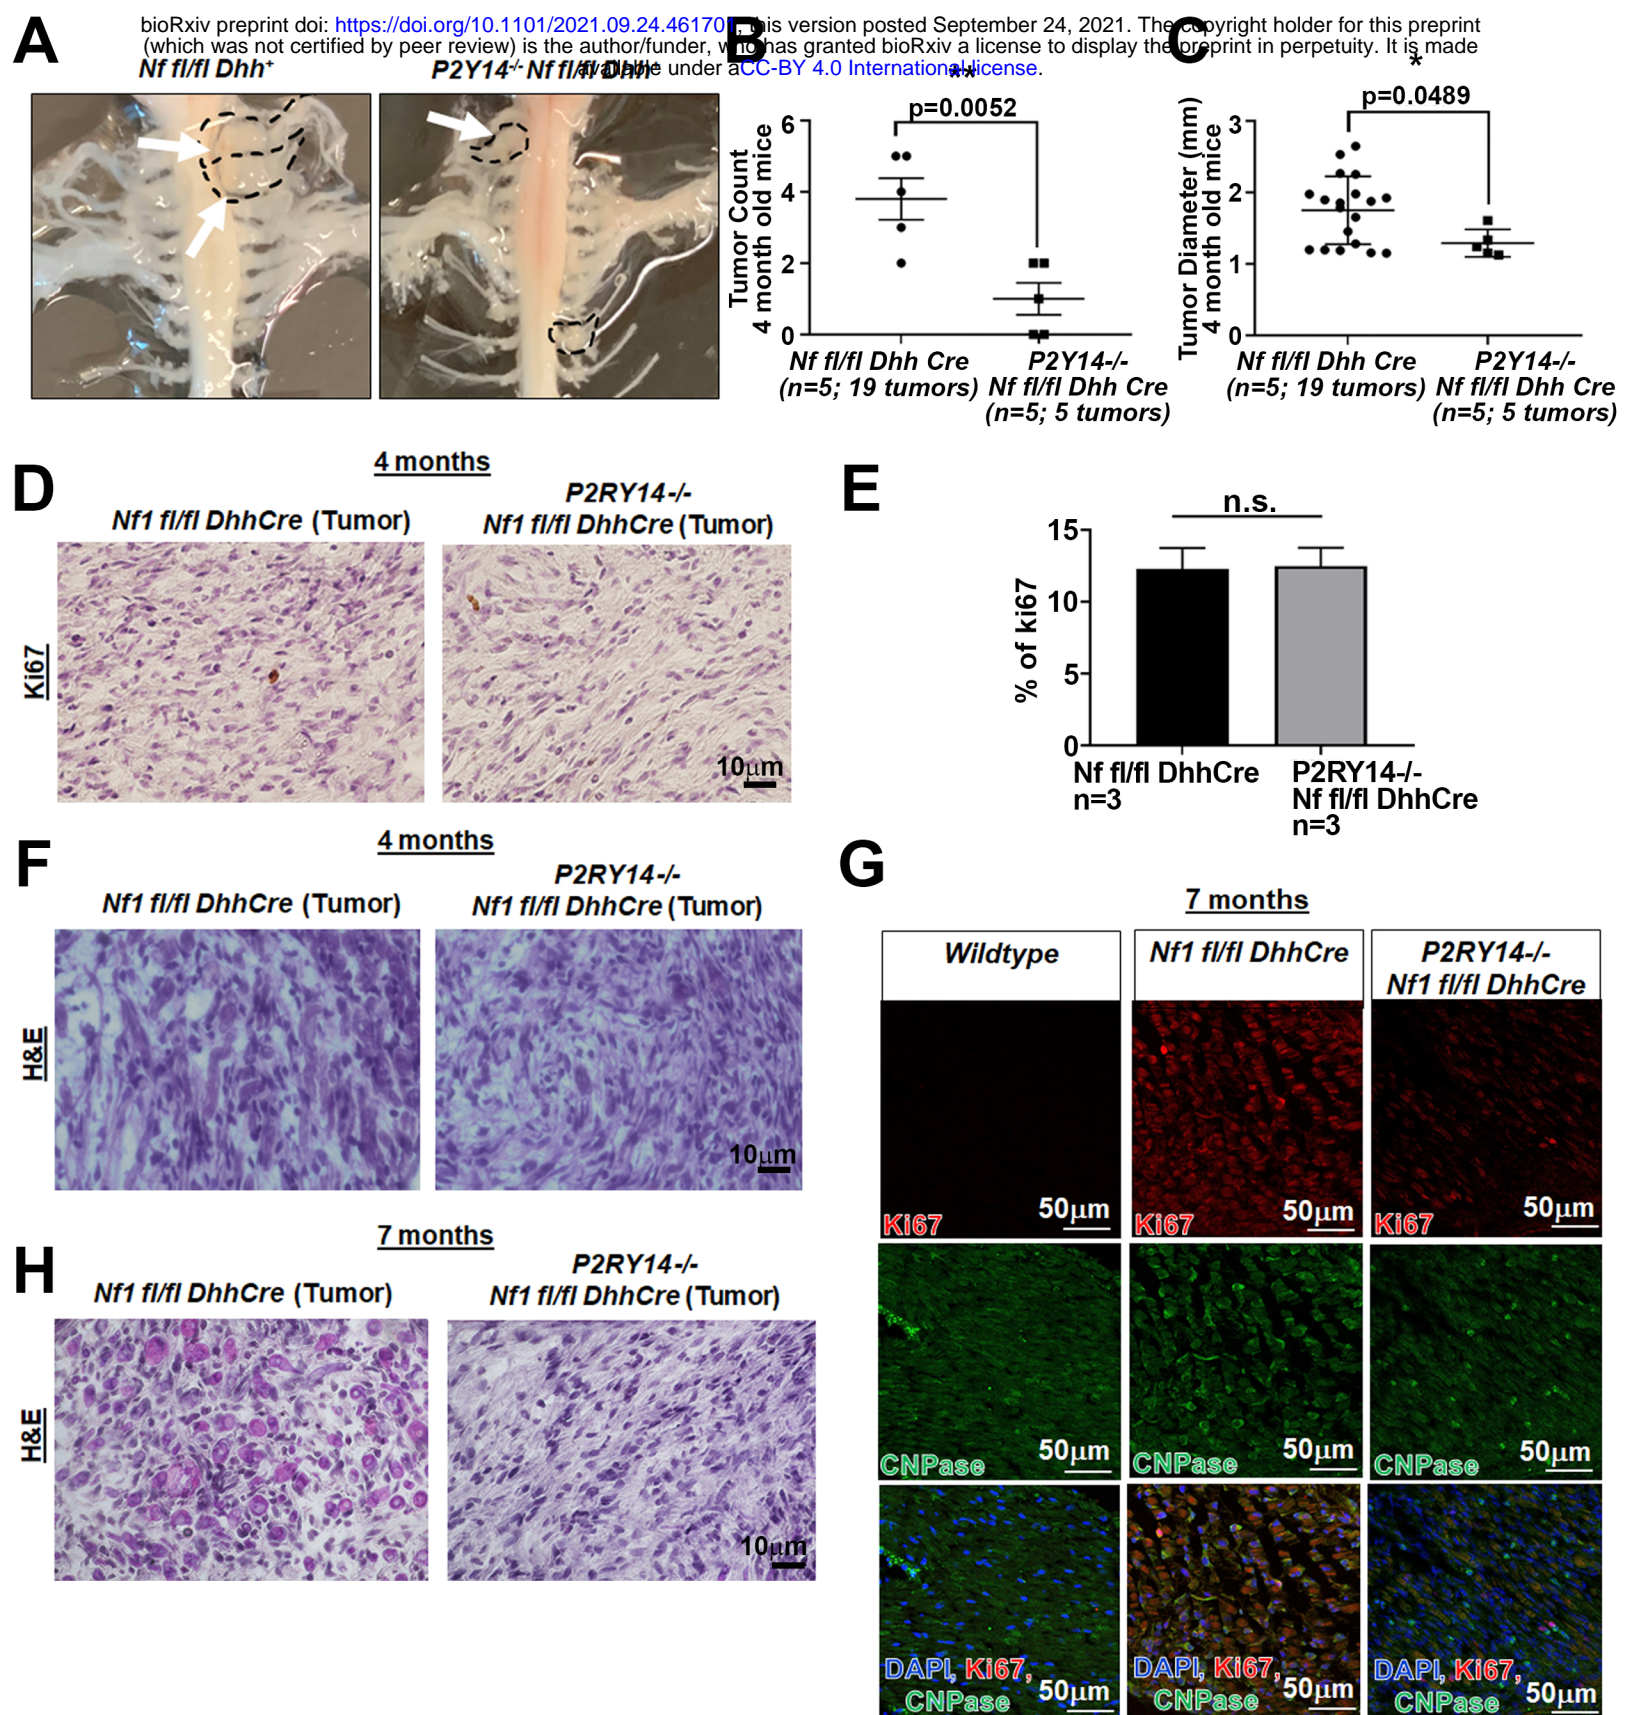

Figure S5

**A**

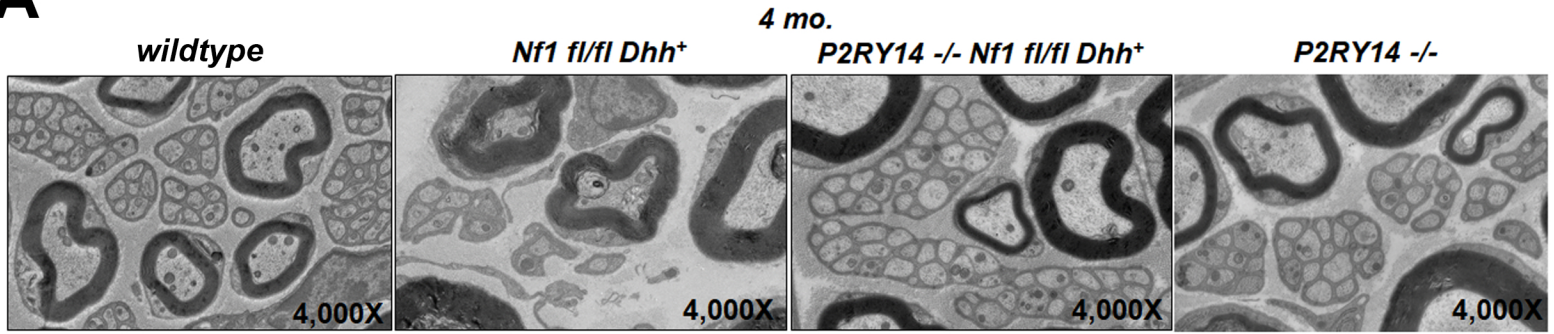

**B**

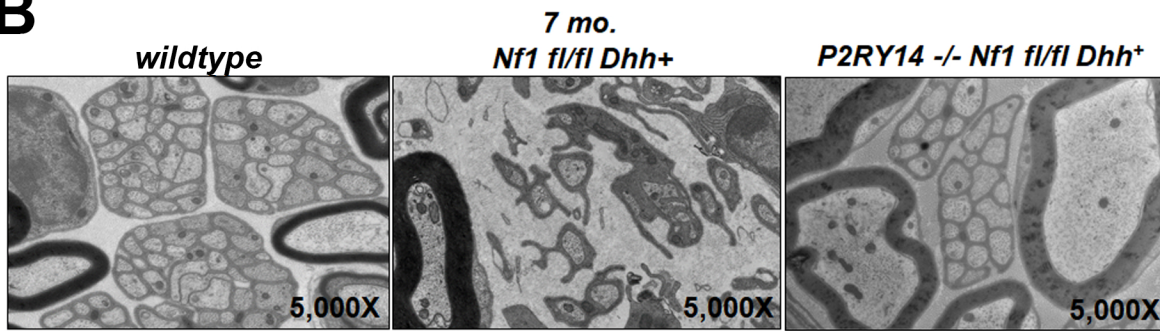

**C**

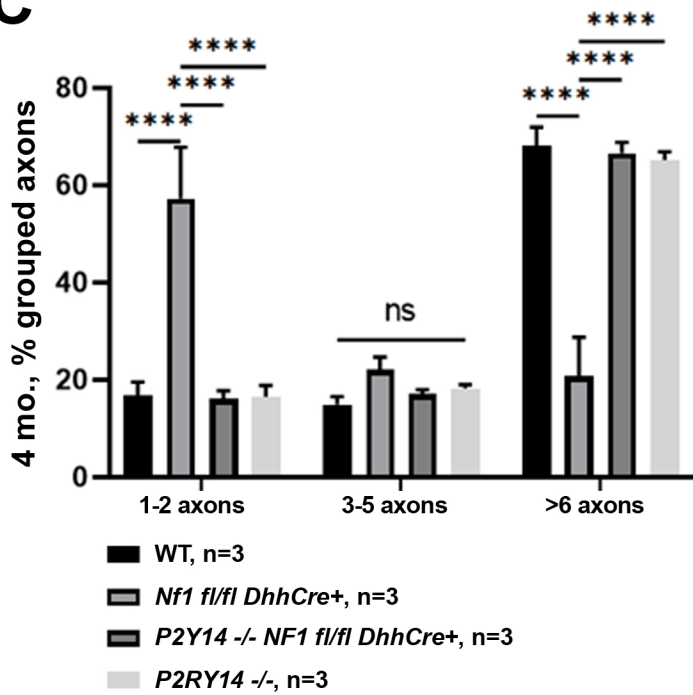

**D**

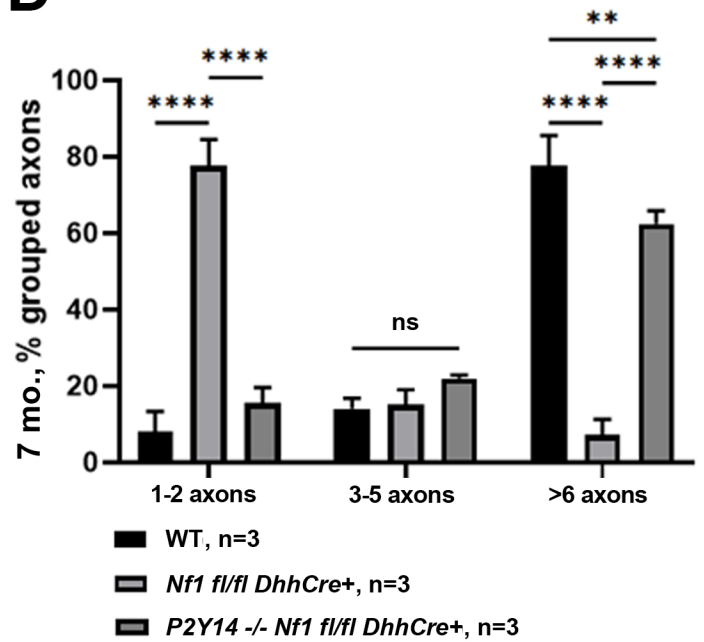

Source: https://www.biorxiv.org/content/biorxiv/early/2021/09/24/2021.09.24.461701.full.pdf
